## **Neural stem cells alter nucleocytoplasmic partitioning and accumulate nuclear polyadenylated transcripts during quiescence**

Rossi, A.<sup>1,2†</sup>, Coum, A.<sup>1†</sup>, Madelenat, M.<sup>1</sup>, Harris, L.<sup>2</sup>, Miedzik A.<sup>1</sup>, Strohbuecker, S.<sup>2</sup>, Chai, A.<sup>1</sup>, Fiaz, H.<sup>1</sup>, Chaouni, R.<sup>1</sup>, Faull, P.<sup>2</sup>, Grey, W.<sup>2</sup>, Bonnet, D.<sup>2</sup>, Makeyev, E. V.<sup>1</sup>, Snijders, A. P.<sup>2</sup>, Kelly, G.<sup>2</sup>, Guillemot, F.<sup>2</sup> & Sousa-Nunes, R.<sup>1\*</sup>

<sup>1</sup>Centre for Developmental Neurobiology, Institute of Psychiatry, Psychology and Neuroscience, King's College London, Newcomen Street, London SE1 1UL, United Kingdom

<sup>2</sup>The Francis Crick Institute, 1 Midland Road, London NW1 1AT, United Kingdom

†Equal contribution

\*To whom correspondence should be addressed: [rita.sousa-nunes@kcl.ac.uk](mailto:rita.sousa-nunes@kcl.ac.uk)

**Quiescence is a cellular state characterised by reversible cell-cycle arrest and diminished biosynthetic activity that protects against environmental insults, replicative exhaustion and proliferation-induced mutations<sup>1</sup>. Entry into and exit from this state controls development, maintenance and repair of tissues plus, in the adult central nervous system, generation of new neurons and thus cognition and mood<sup>2-4</sup>. Cancer stem cells too can undergo quiescence, which confers them resistance to current therapies<sup>5,6</sup>. Despite clinical relevance, quiescence is poorly understood and is defined functionally given lack of molecular markers. Decrease of the most resource-intensive cellular process of protein synthesis is a feature of quiescence, controlled across species and cell types by inhibition of the Target of Rapamycin pathway<sup>1,7</sup>. Here, we combine *Drosophila* genetics and a mammalian model to show that altered nucleocytoplasmic partitioning and nuclear accumulation of polyadenylated RNAs are novel evolutionarily conserved hallmarks of quiescence regulation. These mechanisms provide a previously unappreciated regulatory layer to reducing protein synthesis in quiescent cells, whilst priming them for reactivation in response to appropriate cues.**

Neural stem cells (NSCs) give rise to various neuronal and glial cell types in the central nervous system (CNS), mostly during development but also during adult stages in many species, including humans<sup>8-12</sup>. In adult mammals, NSCs are mostly quiescent<sup>13,14</sup> and their exit from quiescence (reactivation) is controlled by cell-extrinsic and -intrinsic mechanisms in response to physiological and behavioural stimuli including physical exercise, novel environments, social interactions, and diet<sup>4</sup>. Across cell types, a variety of intercellular signals, receptors and downstream pathways converge on the Target of Rapamycin (TOR) pathway for quiescence regulation in eukaryotic cells<sup>1</sup>. We and others

have shown that in NSCs from fruitflies to mammals, the TOR pathway integrates aminoacid availability and the nutritionally-regulated Insulin / Insulin Growth Factor signalling pathway towards the quiescence/activation decision via downstream effectors such as forkhead-box FoxO transcription factors and ribosomal protein S6 kinase, which control cell-cycle and protein translation<sup>15-20</sup>.

Quiescence is heterogeneous, consisting of a continuum of states between near-active (“shallow”) and profound quiescence (dormancy), with depth defined by reactivation speed<sup>21-23</sup>. A bistable molecular network converts graded cues into ON or OFF S-phase entry<sup>23,24</sup>. In the fruitfly *Drosophila melanogaster*, the cell-cycle stage at which divisions pause (G1 or G2) also contributes to heterogeneity of quiescent NSCs (qNSCs) arrested in either G1 or G2<sup>25</sup>.

*Drosophila* NSCs are a powerful model with which to study fundamental molecular and cellular mechanisms of stem cell properties, including quiescence<sup>26</sup>. Out of ~100 pairs of central brain NSCs plus hundreds in the ventral nerve cord, all but five pairs undergo quiescence during a period of ~24-48 hours that intervenes between embryonic and postembryonic neurogenesis<sup>27,28</sup>. In addition to paused proliferation, *Drosophila* qNSCs differ from active NSCs (aNSCs) in a number of discernible ways: size (soma diameter ~4 µm in early larvae, when quiescent and ~10-12 µm in late larvae, when active); morphology (presenting a cytoplasmic extension/fibre of unknown function only when quiescent<sup>27</sup>); expression levels of NSC markers (e.g. downregulating the cortical protein Miranda (Mira) and the HES family basic helix-loop-helix transcriptional repressor Deadpan (Dpn) below detectability in a considerable fraction of qNSCs) (Fig. 1a,d). Following larval hatching and feeding, qNSCs reactivate in a stereotypical spatiotemporal pattern<sup>15,27</sup>. As they reactivate, the qNSC soma enlarges, fibres thicken and are lost (via inheritance by the first post-activation transit-amplifying daughter cell<sup>29</sup>), and NSC

markers become detectable ([Fig. 1d](#) and [Extended Data Fig. 1](#)). At late larval stages, all NSCs are active. Together, these properties enable fast and quantitative study of the processes governing NSC quiescence/reactivation in *Drosophila*.

The nuclear pore complex (NPC) is the evolutionarily conserved gateway for bidirectional transport between nucleus and cytoplasm in eukaryotic cells. The NPC is assembled from multiple copies of ~30 distinct nucleoporins present in multiple copies<sup>30</sup>, grouped into several major classes. Around one third are scaffold nucleoporins, which form two eight-fold rotationally-symmetric doughnut-shaped structures outlining the pore canal<sup>30</sup>. Another third are FG-nucleoporins, containing repeated phenylalanine (F) and glycine (G) motifs. FG and FxFG-rich sequences promote natively unfolded conformations that extend either to the centre of the pore canal in “mesh” or “barrier” nucleoporins; or into the cytoplasm or nucleoplasm in “asymmetric” nucleoporins ([Supplementary Table 1](#)). FG nucleoporins form low-affinity high-specificity interactions with cargo complexes to be transported, whilst excluding unwanted ones<sup>30,31</sup>. Nucleoporins can take on diverse functions besides their role in nucleocytoplasmic transport, most notably transcriptional and microtubule regulation<sup>32-34</sup>.

Whilst small molecules (<40 kDa) can passively diffuse across the NPC, efficient distribution of larger proteins between nucleus and cytoplasm depends on active transport. This is fuelled by hydrolysis of guanosine nucleoside triphosphate (GTP) by the small GTPase Ran<sup>35</sup>. In this case, evolutionarily conserved karyopherins (called importins or exportins, [Supplementary Table 2](#)) associate with nuclear localisation and/or nuclear export signals in protein cargo and facilitate their translocation across the NPC<sup>36</sup>. Most mRNAs are exported from the nucleus to the cytoplasm as messenger ribonucleoprotein complexes (mRNPs) in a manner reliant on ATP-dependent events rather than Ran GTPase and karyopherins<sup>37</sup>. Following pre-messenger RNA processing,

which typically includes 5'-capping, splicing, 3'-cleavage and polyadenylation, mature mRNPs associated with components of the Transcription and Export (TREX), and Nuclear RNA export factor 1 / Nuclear Transport Factor 2 Like Export Factor 1 (NXF1/NXT1) complexes are irreversibly translocated to the cytoplasm<sup>37</sup>. In addition to the non-discriminatory bulk mRNA export pathway, metazoans have evolved selective mRNA export pathways. Although less well characterised, some of these mechanisms depend on specific nucleoporins or Exportin-1 (Xpo1/Crm1)<sup>37,38</sup>. Selective export pathways employ post-transcriptional modifications, structural and/or *cis* elements within the mRNA (named untranslated sequence elements for regulation, USER, codes; though some are embedded in coding sequence) for recruitment of RNA binding proteins. USER codes promote coordinated export of functionally related mRNAs yet a single transcript can have multiple USER codes, which can synergise or compete. At least a subset of mRNAs may utilise several possible export pathways in accordance with export factor availability<sup>37-39</sup>.

It is emerging that levels and/or complement of nucleoporin and karyopherin complexes vary between cell and tissue types<sup>40-42</sup>. Here, we expand this to quiescent versus active NSCs, demonstrating a previously unappreciated layer of gene expression regulation for the transition between active and quiescent states.

### **Downregulation of novel *Drosophila* protein induces anachronic qNSCs**

In a forward-genetic ethyl methane-sulfonate screen, we recovered a *Drosophila* mutant (2V327) in which late larval NSCs, normally active, were cell-cycle arrested whilst displaying a fibre, features of qNSCs. This was seen in whole homozygous animals and homozygous clones induced in early larvae (Fig. 1b) demonstrating cell-autonomy of the phenotype and derivation from mitotic recombination (basis of labelled clone generation). We hypothesized that the 2V327 mutation led to anachronic quiescence reentry of NSCs.

Deficiency-mapping exposed a small genomic region responsible for the phenotype, with hemizygote animals recapitulating that of homozygotes (Fig. 1b and Extended Data Fig. 2). Amongst seven protein-coding genes within the candidate region, RNA interference (RNAi) for only one, *CG14712*, phenocopied the 2V327 mutant (Fig. 1b). Genomic sequencing of *CG14712* exons in 2V327 heterozygous animals uncovered a premature STOP codon, consistent with its disruption causing the phenotype (Fig. 1c). We named this previously uncharacterized gene *snorlax* (*snx*). Homozygous and hemizygous *snx*<sup>2V327</sup> animals were both lethal as undersized late larvae and quantification of NSC features showed comparable phenotypes (Fig. 1d). 2V327 is thus a strong loss-of-function allele, likely a null. Appreciably fewer than the customary ~100 cells per central brain lobe were detectable with Dpn and Mira antibodies in *snx*<sup>2V327</sup> (Fig. 1d) but staining for the apoptotic marker Death Caspase-1 (Dcp-1) was negative in all NSCs examined (Extended Data Fig. 3). Overall, the presence of a fibre accompanying cell-cycle arrest, along with detection of fewer Dpn and Mira-positive cells, is consistent with late larval quiescence in *snx* mutant and knockdown NSCs.

Reversibility is a defining feature of quiescence. To test reversibility of the *snx* loss-of-function phenotype in NSCs, we transiently induced *snx*<sup>RNAi</sup> in these cells followed by a period of recovery, and analysed animals before (B) and after recovery (R) (Fig. 1e). Cells undetectable by anti-Mira or anti-Dpn before recovery re-emerged as visible with these markers following the recovery period, demonstrating that they had neither died nor differentiated. Furthermore, recovery also decreased the number of NSCs displaying fibres and increased the mitosis index (reported by expression of phospho-histone H3, PH3), indicating shift of qNSCs to aNSCs (Fig. 1e). We concluded that the NSC phenotype of *snx*<sup>RNAi</sup> was reversible and that, by all criteria, *snx* downregulation in NSC induces anachronic quiescence.

## **Knockdown of nucleoporins of all classes in *Drosophila* NSCs induces quiescence features**

CG14712/Snx is a putative FG nucleoporin ([Fig. 1c](#); flybase.org), most similar to Nup98, which is found on both the nuclear and cytoplasmic sides of the NPC<sup>30,43</sup> ([Supplementary Table 1](#)). There is a *bona fide Drosophila* Nup98, however, encoded by the *Nup98-96* gene (Nup98 and Nup96 are generated from a single transcript as a polypeptide precursor that undergoes proteolytic cleavage in various species<sup>44</sup>). We found that, like for *snx*, transient knockdown in NSCs of *Nup98-96* followed by recovery also induced quiescence as defined by reversible downregulation of Dpn, Mira and PH3 accompanied by presence of the fibre structure ([Extended Data Fig. 4](#)).

We next wondered whether qNSC induction was specific to knockdown of Nup98-like factors or might result also from downregulation of other nucleoporins. We tested available RNAi lines against the other *Drosophila* nucleoporins spread across structural classes. NSC-specific knock-down of 17 out of 27 further nucleoporins induced features of quiescence (fewer Dpn, Mira and PH3-positive cells, plus fibres) with at least one RNAi, 12 with more than one ([Fig. 2a](#)). Negative RNAi outcomes could be due to the target having no role in quiescence regulation or to maternal contribution<sup>45</sup>, long protein half-life (reported for scaffold nucleoporins<sup>46</sup>) and/or ineffective RNAi (although some constructs that did not induce a phenotype in our assay appeared effective in other contexts<sup>47-49</sup>). Nonetheless, the fact that knockdown of multiple nucleoporins among all classes induced features of quiescence suggested that disruption of their function at the NPC caused the phenotype.

## **Knockdown of active nucleocytoplasmic transport regulators in *Drosophila* NSCs also induces quiescence features**

To verify that nucleocytoplasmic transport perturbation underlined NSC quiescence induction, we knocked down active transport components. Knockdown of Ran, its GTPase activating protein (RanGAP) and guanine nucleotide exchange factor (RanGEF), or of a small subset of karyopherins induced qNSC features (Fig. 2b). In particular, knockdown of Exportin-1 and -2, Importin- $\beta$ , Tnpo and Tnpo-SR led to strong phenotypes with at least two lines (Fig. 2b). Thus, specific perturbations of nucleocytoplasmic transport induce quiescence in *Drosophila* NSCs.

### **WT and induced *Drosophila* qNSCs accumulate nuclear polyadenylated RNA**

Karyopherins have been shown to mediate transport of functionally-related proteins<sup>36,50</sup>. Examining biological process gene ontology (GO) terms of known cargo for specific karyopherins<sup>36,50</sup> whose knockdown induced qNSCs (Fig. 2b) led us to hypothesise that messenger RNA (mRNA) processing might be altered in quiescent versus active NSCs. Furthermore, we noted that Nups with analogous phenotype (Fig. 2a) included those of the so-called mRNA export platforms<sup>30</sup>. We thus considered whether there might be altered distribution of polyadenylated (poly(A)) RNA between aNSCs and qNSCs.

*In situ* hybridisation with an oligo(dT) probe reported visibly lower poly(A) in qNSCs than aNSCs, as expected from diminished transcription in quiescent cells (Fig. 3a). Nonetheless, we reproducibly found discrete poly(A) accumulations within nuclei of deeply quiescent NSCs (newly-hatched larvae), whereas in permanently active mushroom body NSCs nuclear poly(A) localised predominantly at the nuclear periphery (Fig. 3a). We quantified relative poly(A) immunofluorescence in nuclear and cytoplasmic compartments of NSCs in the two states and discovered that the nuclear/cytoplasmic ratio of poly(A) was higher in qNSCs than in the mushroom body NSCs (Fig. 3b). In case there was something particular about permanently-active NSCs, we determined the



nuclear/cytoplasmic ratio of poly(A) in the same NSC as it reactivated (as we can identify the same cell across specimen). Therein, we found decrease in relative nuclear accumulation of poly(A) as the NSC reactivated (Fig. 3b), consistent with aNSCs having lower nuclear/cytoplasmic ratio of poly(A) than qNSCs. We concluded that relative accumulation of nuclear poly(A) RNA is a trait of qNSCs in *Drosophila*.

To further assess similarity between physiological quiescence and quiescence induced by perturbation of nucleocytoplasmic transport components, we examined whether relative accumulation of nuclear poly(A) RNA also occurred in the latter. Consistent with quiescence reentry as opposed to quiescence maintenance, induced anachronic qNSCs were generally larger and more loaded with poly(A) relative to the deeply quiescent NSCs of newly-hatched larvae. Inspection of late larval NSCs with knockdown of either Snx or Nup98-96 revealed cells with very strong nuclear poly(A) signal (Fig. 3c).

### **Nuclear accumulation of polyadenylated RNA is a hallmark of quiescence**

We reasoned that nuclear accumulation of transcripts would be an efficient way for quiescent cells to reduce protein synthesis whilst remaining able to quickly resume it in response to reactivation cues. To test if this might be a widespread mechanism of quiescence, we first examined primary cultures of adult mouse hippocampal NSCs, where quiescence is induced by addition of BMP4, mimicking a niche signal<sup>51,52</sup>. We had previously determined that these cells become quiescent after 3 days in BMP4<sup>52</sup> and routinely used this timepoint as the quiescent condition unless otherwise specified. Synchronicity of quiescence induction in culture permitted determination of relative levels of nuclear and cytoplasmic poly(A) across many cells in an equivalent state. We found that both nuclear and cytoplasmic poly(A) signals decreased in qNSCs compared to aNSCs, but that cytoplasmic levels consistently decreased more, resulting in increased

nuclear/cytoplasmic ratio (Fig. 4a,b). Importantly, inspection of adult hippocampal NSCs *in vivo* also showed increased nuclear/cytoplasmic poly(A) ratio in quiescent versus active cells (Fig. 4c,d). Separation between the two conditions was less marked in tissue as there is continuity between the two states and no means of determining how long each cell had been quiescent or active for at the time of fixation. Notwithstanding, the extent of relative poly(A) RNA accumulation was remarkably similar to that found *in vitro*. Surveying of human blood marrow haematopoietic stem and progenitor cells returned the same finding (Extended Data Fig. 5). We concluded that nuclear accumulation of poly(A) RNA is an evolutionarily-conserved hallmark of quiescence across species and cell types.

### **Downregulation of Nup98-96 in mouse NSCs induces quiescence features**

To enquire into evolutionary conservation of the mechanism we found underpinning nuclear accumulation of poly(A) in quiescence in *Drosophila* NSCs, we knocked down Nup98-96 in mouse hippocampal NSC cultures. After confirming that Nup98 levels decreased in response to short-hairpin RNA (shRNA), we determined the proportion of cells positive for the proliferation antigen Ki67 and measured accumulation of nuclear poly(A). Nup98-96 knockdown samples had a reduced percentage of Ki67<sup>+</sup> cells and accumulated nuclear poly(A) RNA in the absence of cell death as reported by cleaved Caspase 3 (Fig. 4e,f). We concluded that, like in *Drosophila* NSCs, downregulation of Nup98 in mouse NSCs induced quiescence.

### **Most nucleoporins and active nucleocytoplasmic transport factors are downregulated in qNSCs relative to aNSCs**

Whilst downregulation of nucleocytoplasmic transport components through experimental manipulation can induce NSC quiescence, we wondered whether this occurred

physiologically. Although several RNA sequencing (RNA-seq) studies have revealed differences between active and quiescent NSC mRNA expression<sup>22,52-59</sup>, our data suggests that a substantial fraction of mRNA (which makes up the largest fraction of poly(A) RNA<sup>60,61</sup>) might not be translated during quiescence due to nuclear retention. We therefore wanted to determine the relative expression of nucleocytoplasmic transport factors at the protein level, which we predicted would be downregulated in qNSCs relative to aNSCs. Moreover, given that our findings predict higher discordance between whole-cell mRNA and protein expression in quiescence versus other cellular states, we compared protein expression between aNSCs and qNSCs, not reported before.

Taking advantage of suitability of the mouse NSC monoculture system for biochemical studies, we performed quantitative mass spectrometry. Protein extracts from adult mouse hippocampal NSCs were prepared on different days post-BMP4 addition (0 days being the active condition), having ascertained that longer exposure to BMP4 corresponded to deeper quiescence ([Extended Data Fig. 6](#)), and longitudinal proteome profiling was carried out by tandem mass tag (TMT) spectrometry<sup>62</sup>. Principal component analysis (PCA) showed that BMP4 exposure length accounted for the majority of protein changes within 3 days ([Fig. 5a](#)), our standard quiescent condition. 5,771 proteins were reliably identified and quantified in all fractions, with over four-fifths changing considerably in either direction and nearly as many upregulated as downregulated over 21 days of BMP4 exposure ([Fig. 5b and Supplementary Table 3](#)). Validating the data, proteins whose levels are known to be altered in qNSCs behaved as expected<sup>52,63</sup>. ID1 was upregulated as cells shifted into quiescence; whilst Minichromosome maintenance complex component 2 (Mcm2), Cyclin-dependent kinase 1 (Cdk1), Proliferating cell nuclear antigen (PCNA) and Vimentin (Vim) were strongly downregulated ([Fig. 5c](#)). Furthermore, the negative regulators of the TOR pathway Tuberous sclerosis proteins 1 and 2 (Tsc1 and Tsc2) were upregulated, and proteins involved in DNA replication and cell-cycle progression were

well represented amongst those downregulated in qNSCs relative to aNSCs (Supplementary Table 3).

Biological processes GO term analysis revealed the most downregulated categories of proteins in qNSCs as (m)RNA processing and metabolism, as well as DNA organisation and metabolism (Fig. 5d, Supplementary Table 4). Consistent with the hypothesis that poly(A) RNAs accumulated in the nucleus due to reduced availability of nucleocytoplasmic transport factors, we detected lower levels of most of these factors as NSCs transitioned from an active state into deep quiescence; none were upregulated (Fig. 5e, Supplementary Table 3). Specifically, three-quarters of nucleoporins (23, containing members of all structural classes), were detected in our proteome-wide investigation, with 19 (representing all structural classes) consistently decreased in qNSCs, and 4 expressed at comparable levels across conditions (Fig. 5e, Supplementary Table 3). Employing independent methods (Western blots or immunocytochemistry), we confirmed significant downregulation of a few Nucleoporins after 3 days of BMP4 (Extended Data Fig. 7). This data suggests altered nucleoporin stoichiometry in qNSCs versus aNSCs although it remains unclear how it changes specifically at the NPC. Regarding active nucleocytoplasmic transport regulators, we detected 26, with levels of all but three decreasing as NSCs shifted into quiescence (Fig. 5e, Supplementary Table 3). In all, multiple nucleocytoplasmic protein transport factors are downregulated in qNSCs relative to aNSCs.

### **Most splicing factors and known mRNA export pathway proteins are also downregulated in qNSCs relative to aNSCs**

mRNA export from the nucleus is coupled to pre-mRNA processing, including a checkpoint for completed splicing<sup>31,35,37,64</sup>. Furthermore, and in line with proteomic

downregulation of (m)RNA processing and metabolism components, we considered the possibility that the effect of altered nucleocytoplasmic transport on nuclear accumulation of poly(A) RNA in qNSCs might be an indirect consequence of incomplete splicing, limitation of mRNA export pathway components and/or upregulation of nuclear retention factors<sup>37,39</sup>.

In our proteome-wide investigation, we detected 228 splicing factors of which 204 were consistently downregulated as NSCs transitioned from active into deeper quiescence; intriguingly, 12 were consistently upregulated (Fig. 5e, Supplementary Table 3). Concerning nuclear mRNA export, a few nucleoporins such as Nup96, Gle1, Nup155 and Tpr play key roles in this process<sup>37,39</sup>; the latter two were detected and both downregulated (Supplementary Table 3). Moreover, we detected 38 mRNA export factors<sup>37,39</sup> of which 37 were downregulated in qNSCs (Fig. 5e, Supplementary Table 3). Concerning nuclear retention factors, only few are known<sup>39</sup>, and those picked up in our proteome analysis were downregulated in qNSCs, suggesting they are not responsible for the observed nuclear retention of poly(A) RNA (Supplementary Table 3). Overall, this data is consistent with accumulation of nuclear poly(A) RNA being due to incomplete pre-mRNA splicing and/or limitations in mRNP export factors.

### **Fractionated RNA-sequencing identifies nuclear-accumulated transcripts in qNSCs relative to aNSCs**

To determine the identity and splicing status of nuclear-accumulated transcripts in qNSCs, we fractionated adult mouse hippocampal aNSC and qNSC cultures into nuclear and cytoplasmic compartments and performed RNA-seq on each (fracRNA-seq). We prepared samples from two quiescence depths, corresponding to 3 and 10 days BMP4 exposure (qNSC-3d and qNSC-10d). Transcripts corresponding to a total of 30,265 genes

were detected, of which 19,979 (66 %) were protein-coding (including 2,152 non experimentally confirmed; [Supplementary Table 5](#)); about 95.5 % of reads mapped to protein-coding genes (Gene Expression Omnibus GSE162047). PCA showed progressive divergence of BMP4-treated NSCs from aNSCs as a function of time and further clustering of samples according to subcellular compartment ([Fig. 6a](#)).

For transcripts pertaining to each gene, and irrespectively of levels or splicing status, we determined the proportion of exonic reads found in nuclear versus cytoplasm from paired extracts for each sample. For each gene we ascribed a bias score  $Z = \log_2 [\text{number of nuclear reads} / \text{number of cytoplasmic reads}]$ , with  $Z > 0$  indicating bias towards the nucleus and  $Z < 0$  bias towards the cytoplasm ([Fig. 6b](#) and [Supplementary Table 5](#)). Validating the data, transcripts predicted to be biased towards nuclear or cytoplasmic compartments behaved as expected<sup>65</sup> in all conditions and samples: *Nuclear Paraspeckle Assembly Transcript 1*, *Metastasis Associated Lung Adenocarcinoma Transcript 1* and *Plasmacytoma Variant Translocation 1* with a positive  $Z$ , indicating nuclear bias; *Ribosomal protein small subunit S14*, *Glyceraldehyde-3-phosphate dehydrogenase* and *Rn7s1* with a negative  $Z$ , indicating cytoplasmic bias.

In aNSCs, transcripts from 12,096 genes were significantly biased to either subcellular fraction, 5,637 (47 %) of which were nuclear-biased (3,026 with  $Z > 2$  i.e., more than 4-fold bias). In qNSCs-3d, products of 12,812 genes were significantly biased, 6,601 (52 %) of which were nuclear-biased (3,470 with  $Z > 2$ ). In qNSCs-10d, products of 12,227 genes were significantly biased, 7,653 (63 %) of which were nuclear-biased (4,106 with  $Z > 2$ ).

In a second step, we selected those genes whose products were detected in all conditions and performed pairwise comparisons between individual genes across conditions. Significant changes comprised genes whose products swapped bias in subcellular

compartment as well as those whose Z scores changed significantly even if retaining the same compartment bias. Transcripts corresponding to 388 genes changed significantly between aNSCs and qNSCs-3d, of which 247 (64 %) became more nuclear-biased (20 more than 4-fold); 2,584 changed significantly between aNSCs and qNSCs-10d, of which 2,409 (93 %) become more nuclear-biased (311 more than 4-fold); and 590 changed significantly between qNSCs-3d and qNSCs-10d, of which 571 (97 %) became more nuclear-biased (128 by more than 4-fold) (Fig. 6b and Supplementary Table 5). Transcripts of 2,173 genes (86 % of which were protein-coding) changed subcellular bias score significantly and consistently (in the same direction between aNSCs and qNSCs-3d, then again between qNSCs-3d and qNSCs-10d) upon quiescence induction. Of these, transcripts of 1,616 genes (74 %, of which 92 % were protein-coding), became increasingly nuclear with quiescence. In summary, transcripts for most genes had no significant subcellular bias in any of the conditions nor, if they had, did the direction or magnitude of their bias change significantly between active and quiescent states. Notwithstanding, transcripts of more than 2,000 genes, mostly protein-coding, did change subcellular bias significantly, three-quarters of which becoming increasingly nuclear as NSCs shifted from active into deeper quiescence.

### **Nuclear-accumulated transcripts mostly encode proteins downregulated in qNSCs**

Concordant with proteomic downregulation, biological processes GO term analysis revealed the most nuclear-biased categories of transcripts in qNSCs as (m)RNA processing and RNP biogenesis, as well as DNA organisation and metabolism (Fig. 6c, Supplementary Table 6). Cytoplasmic-biased transcripts in qNSCs were enriched in actin cytoskeleton organisation GO terms, consistent with our observations of increased morphological complexity upon quiescence induction (Extended Data Fig. 8; and seen in flies by fibre extension). Moreover, we observed presumed impact on protein levels of

subcellular partitioning of transcripts. TMT detected 46 of the proteins corresponding to the top 100 most nuclear-biased protein-coding transcripts in qNSCs, most of which were downregulated; and 36 of the proteins corresponding to the top 100 most cytoplasmic-biased protein-coding transcripts in qNSCs, most of which were upregulated (Fig. 6c). We conclude that altered nucleocytoplasmic distribution of transcripts in qNSCs contributes to regulation of protein expression.

Among transcripts that became increasingly nuclear as NSCs shifted into deeper quiescence were those for around a third of nucleoporins and karyopherins (Supplementary Tables 5 and 6). As per the analysis above, this likely contributes to the observed downregulation of corresponding proteins (Fig. 5e), additionally to transcriptional downregulation<sup>52</sup>. We note that this could create positive-feedback loops whereby an initially small decrease in protein or cytoplasmic transcripts of these factors could exacerbate each other, gradually leading to a pronounced downregulation of nucleocytoplasmic transport factors and a resulting deepening of quiescence.

### **Nuclear-accumulation of transcripts in qNSCs relative to aNSCs is not due to intron retention**

Our proteomic data showed global decrease of splicing factor levels in qNSCs (Fig. 5e, Fig. 6c and Supplementary Tables 3 and 4). If transcript splicing were reduced as NSCs shift into quiescence, this would result in pre-mRNA retention in the nucleus. To assess whether transcript nuclear-bias during quiescence could be globally accounted for by decreased splicing, we analysed intron retention (IR). For each intron of transcripts found in each subcellular fraction we ascribed an IR score = [number of intronic reads / (number of intronic reads + number of spliced reads)], with  $0 < IR < 1$ .



The majority of significant IR changes were observed in nuclear fractions as might be expected, with those in cytoplasmic fractions an order of magnitude lower ([Extended Data Fig. 9 and Supplementary Table 7](#)). In nuclear fractions, 3,362 introns corresponding to 1,708 genes showed significant IR changes between at least two conditions ([Fig. 7a and Supplementary Table 7](#)) so, an average of only two introns per gene. Of these, 1,110 (65 %) genes corresponded to transcripts that became increasingly nuclear in qNSCs, 302 (18 %) to ones that became increasingly cytoplasmic, and 296 (17 %) to ones that showed no consistent subcellular change ([Fig. 7b pie charts and Supplementary Table 7](#)). For the most part, the various introns of a transcript showed the same directionality of IR as NSCs shifted from active into deeper quiescence ([Fig. 7c and Supplementary Table 7](#)) and the vast majority of significant IR changes in the nucleus consisted of IR *decrease*.

In agreement with the categories of transcripts that became increasingly nuclear as quiescence deepened, biological process GO terms for the 934 genes encoding nuclear-biased transcripts with decreased IR in nuclear fractions pertained to (m)RNA processing and chromatin regulation; and those for the 98 nuclear-biased transcripts with increased IR pertained mostly to mitosis, followed by (m)RNA processing ([Fig 7b right and Supplementary Table 8](#)). In summary, despite a small and potentially meaningful category of genes where increased IR positively correlates nuclear-biased transcripts, most transcripts that become more nuclear during NSC quiescence are not retained in the nucleus due to increased IR.

The course of transcription, transcript processing and export will result in a steady-state where a particular fraction of transcripts is nuclear at any one time, and where a particular fraction of nuclear transcripts is incompletely spliced at any one time. Our analyses reveal that this steady-state changes between aNSCs and qNSCs for transcripts of a few hundred

genes, towards more nuclear and more completely spliced in quiescence. It is possible that these transcripts benefit especially from the few splicing factors that exhibit higher protein levels during quiescence (Figure 5e). Another possibility is that overall decrease in splicing is commensurate with decrease in transcriptional rate during quiescence, and that decrease in IR results from longer residence of nuclear-biased transcripts in the nucleus. In either case, limiting amounts of (a) mRNA export factor(s) could account for nuclear accumulation even of completely spliced transcripts<sup>37,39</sup> and for those incompletely spliced, allow sustained interactions with splicing factors towards completion.

Taken together, our results establish six novel features of NSC quiescence regulation, at least some of which may prove generalisable to other quiescent cell types. First, aNSCs and qNSCs express different concentrations and stoichiometry of nucleoporins, karyopherins and mRNA export factors; second, perturbation of levels of nucleocytoplasmic transport regulators can induce quiescence; third, under physiological conditions as well as during quiescence induction via nucleoporin downregulation, qNSCs exhibit nuclear-bias of a sizeable fraction of polyadenylated transcripts and this increases with quiescence depth; fourth, nuclear- or cytoplasmic-bias of transcripts in qNSCs correlates with down- and upregulation of encoded proteins, respectively; fifth, nuclear and cytoplasmic biases pertain to functionally related transcripts; sixth, for the most part, nuclear bias of transcripts during quiescence is not due to intron retention and in fact correlates largely with increased splicing. Additionally, the concept exposed in this study, of large-scale alteration of nucleocytoplasmic partitioning in quiescent versus active cells offers a new avenue of enquiry into positive quiescence markers. Our proteome and fracRNA-seq data were in agreement, further validating each other and evidencing the impact of mRNA nuclear accumulation on the proteome of qNSCs.

We propose that downregulation of specific (m)RNA export pathway(s) components limits translocation of a subset of (m)RNAs in qNSCs, which allows for timely and orderly reigniting of NSC activity (Fig. 7d). Nuclear-biased mRNAs with decreased IR mostly encode (m)RNA processing regulator whereas those with increased IR mostly encode cell-cycle and mitotic regulators. These mechanisms add nuance to downregulation of protein synthesis during quiescence, via sequential deployment of factors during quiescence entry and, presumably the reciprocal during quiescence exit. Gene products relying differentially on transcription, splicing and/or cytoplasmic translocation will need more or less time for deployment and the first will likely promote readiness of others to follow. Both towards quiescence entry and exit, the post-transcriptional mechanisms described likely interplay with the transcriptional in a series of positive-feedback loops whereby initially small changes in protein or cytoplasmic transcripts are amplified, underlying the continuum of states between deep quiescence and active cells. In fact, the same components may in some cases regulate quiescence at multiple levels and even different mechanisms. Analyses of *Drosophila* mutants for the nucleoporin Mtor/Tpr (whose RNAis did not induce quiescence in this study) implicated it in NSC quiescence regulation via transcriptional effects of the so-called spindle matrix complex<sup>66</sup>.

The fact that subcellular compartmentalisation of most transcripts was not significantly altered between aNSCs and qNSCs argues against general disruption of splicing or mRNA export. Furthermore, since the bulk mRNA export pathway is non-discriminatory and that its canonical components were only modestly downregulated in quiescence, it seems likely that qNSCs selectively regulate (a) discriminatory mRNA export pathway(s) for nuclear-bias of a few hundred transcripts. mRNA export pathways coordinate export of functionally related mRNAs<sup>37,39</sup> but neither are all components of selective pathways

known nor is the complement of mRNAs exported by each known pathway identified<sup>37</sup>.

Future work will reveal whether nuclear-biased transcripts are partial towards specific export and/or splicing factors.

A recent study reported widespread IR in various quiescent cell types<sup>67</sup> but did not report on qNSCs nor did we find this in our study. It is possible that different cell types adopt distinct molecular strategies towards the same goal of selective nuclear-bias of transcripts. Indeed, we report increased nuclear-to-cytoplasmic ratio of poly(A) RNA in a few quiescent cell types relative to active counterparts, in different organisms. Nuclear retention of mRNAs has been observed in reaction to stress or changing cellular conditions, such as differentiation, viral infection or oncogenic transformation. Nuclear retention protects mRNAs from viral nucleases and cytoplasmic decay pathways whilst release allows rapid cellular responses<sup>39</sup>.

Studies in human fibroblasts and zebrafish NSCs have reported Exportin-1-dependent changes in microRNA biogenesis and localisation in quiescence, including accumulation of microRNA-9 and Argonaute proteins (components of RNA silencing complexes) in qNSC nuclei<sup>68,69</sup>. In *Drosophila*, a transient low-level nuclear pulse of the homeobox transcription factor Prospero (Pros) induces *Drosophila* NSC quiescence<sup>70</sup> (its localisation matching that of its adaptor Mira, shown in [Extended Data Fig. 1](#)). RanGEF/Rcc1/Bj1 has been implicated in excluding Pros from aNSC nuclei to allow their self-renewal<sup>71</sup> and its downregulation might therefore enable quiescence-inducing nuclear Pros. The work here presented shows these to be glimpses into larger-scale nucleocytoplasmic transport alterations that control quiescence. We show that downregulation of various nucleoporins or active nucleocytoplasmic transport factors induce NSC quiescence; and that many of these proteins are downregulated in response to a quiescence signal. Furthermore, as expected from altered nucleocytoplasmic transport, we identify cargo that are

differentially partitioned between nucleus and cytoplasm in active versus quiescent NSCs. Specifically, we demonstrate nuclear-bias of hundreds of transcripts presumed to orchestrate a finely-tuned temporal sequence of events in the regulation of quiescence.

## References

1. Valcourt, J. R. *et al.* Staying alive: metabolic adaptations to quiescence. *Cell Cycle* **11**, 1680–1696 (2012).
2. Deng, W., Aimone, J. B. & Gage, F. H. New neurons and new memories: how does adult hippocampal neurogenesis affect learning and memory? *Nat. Rev. Neurosci.* **11**, 339–350 (2010).
3. Schoenfeld, T. J. & Cameron, H. A. Adult neurogenesis and mental illness. *Neuropsychopharmacology* **40**, 113–128 (2015).
4. Urbán, N., Blomfield, I. M. & Guillemot, F. Quiescence of Adult Mammalian Neural Stem Cells: A Highly Regulated Rest. *Neuron* **104**, 834–848 (2019).
5. Chen, W., Dong, J., Haiech, J., Kilhoffer, M.-C. & Zeniou, M. Cancer Stem Cell Quiescence and Plasticity as Major Challenges in Cancer Therapy. *Stem Cells Int.* **2016**, 1740936–16 (2016).
6. Bruschini, S., Ciliberto, G. & Mancini, R. The emerging role of cancer cell plasticity and cell-cycle quiescence in immune escape. *Cell Death Dis.* **11**, 471–3 (2020).
7. Liu, G. Y. & Sabatini, D. M. mTOR at the nexus of nutrition, growth, ageing and disease. *Nat. Rev. Mol. Cell Biol.* **21**, 183–203 (2020).
8. Eriksson, P. S. *et al.* Neurogenesis in the adult human hippocampus. *Nat. Med.* **4**, 1313–1317 (1998).

9. Spalding, K. L. *et al.* Dynamics of hippocampal neurogenesis in adult humans. *Cell* **153**, 1219–1227 (2013).
10. Boldrini, M. *et al.* Human Hippocampal Neurogenesis Persists throughout Aging. *Cell Stem Cell* **22**, 589–599 (2018).
11. Sorrells, S. F. *et al.* Human hippocampal neurogenesis drops sharply in children to undetectable levels in adults. *Nature* **555**, 377–381 (2018).
12. Moreno-Jiménez, E. P. *et al.* Adult hippocampal neurogenesis is abundant in neurologically healthy subjects and drops sharply in patients with Alzheimer's disease. *Nat. Med.* **108**, 1–560 (2019).
13. Ma, D. K., Bonaguidi, M. A., Ming, G.-L. & Song, H. Adult neural stem cells in the mammalian central nervous system. *Cell Res.* **19**, 672–682 (2009).
14. Furutachi, S., Matsumoto, A., Nakayama, K. I. & Gotoh, Y. p57 controls adult neural stem cell quiescence and modulates the pace of lifelong neurogenesis. *EMBO J.* **32**, 970–981 (2013).
15. Britton, J. S. & Edgar, B. A. Environmental control of the cell cycle in *Drosophila*: nutrition activates mitotic and endoreplicative cells by distinct mechanisms. *Development* **125**, 2149–2158 (1998).
16. Paik, J.-H. *et al.* FoxOs cooperatively regulate diverse pathways governing neural stem cell homeostasis. *Cell Stem Cell* **5**, 540–553 (2009).
17. Renault, V. M. *et al.* FoxO3 regulates neural stem cell homeostasis. *Cell Stem Cell* **5**, 527–539 (2009).
18. Chell, J. M. & Brand, A. H. Nutrition-responsive glia control exit of neural stem cells from quiescence. *Cell* **143**, 1161–1173 (2010).

19. Sousa-Nunes, R., Yee, L. L. & Gould, A. P. Fat cells reactivate quiescent neuroblasts via TOR and glial insulin relays in *Drosophila*. *Nature* **471**, 508–512 (2011).
20. Paliouras, G. N. *et al.* Mammalian target of rapamycin signaling is a key regulator of the transit-amplifying progenitor pool in the adult and aging forebrain. *J. Neurosci.* **32**, 15012–15026 (2012).
21. Rodgers, J. T. *et al.* mTORC1 controls the adaptive transition of quiescent stem cells from G0 to G(Alert). *Nature* **510**, 393–396 (2014).
22. Llorens-Bobadilla, E. *et al.* Single-Cell Transcriptomics Reveals a Population of Dormant Neural Stem Cells that Become Activated upon Brain Injury. *Cell Stem Cell* **17**, 329–340 (2015).
23. Kwon, J. S. *et al.* Controlling Depth of Cellular Quiescence by an Rb-E2F Network Switch. *Cell Rep.* **20**, 3223–3235 (2017).
24. Heldt, F. S., Barr, A. R., Cooper, S., Bakal, C. & Novák, B. A comprehensive model for the proliferation-quiescence decision in response to endogenous DNA damage in human cells. *Proc. Natl. Acad. Sci. U.S.A.* **115**, 2532–2537 (2018).
25. Otsuki, L. & Brand, A. H. Cell cycle heterogeneity directs the timing of neural stem cell activation from quiescence. *Science* **360**, 99–102 (2018).
26. Ding, W. Y., Huang, J. & Wang, H. Waking up quiescent neural stem cells: Molecular mechanisms and implications in neurodevelopmental disorders. *PLoS Genet.* **16**, e1008653 (2020).
27. Truman, J. W. & Bate, M. Spatial and temporal patterns of neurogenesis in the central nervous system of *Drosophila melanogaster*. *Dev. Biol.* **125**, 145–157 (1988).

28. Urbach, R., Schnabel, R. & Technau, G. M. The pattern of neuroblast formation, mitotic domains and proneural gene expression during early brain development in *Drosophila*. *Development* **130**, 3589–3606 (2003).
29. Bostock, M. P. *et al.* An Immobilization Technique for Long-Term Time-Lapse Imaging of Explanted *Drosophila* Tissues. *Front. Cell Dev. Biol.* **8**, 1–14 (2020).
30. Kim, S. J. *et al.* Integrative structure and functional anatomy of a nuclear pore complex. *Nature* **555**, 475–482 (2018).
31. Aitchison, J. D. & Rout, M. P. The yeast nuclear pore complex and transport through it. *Genetics* **190**, 855–883 (2012).
32. Chatel, G. & Fahrenkrog, B. Dynamics and diverse functions of nuclear pore complex proteins. *Nucleus* **3**, 162–171 (2012).
33. Obado, S. O. & Rout, M. P. Cilia and Nuclear Pore Proteins: Pore No More? *Dev. Cell* **38**, 445–446 (2016).
34. Jühlen, R. & Fahrenkrog, B. Moonlighting nuclear pore proteins: tissue-specific nucleoporin function in health and disease. *Histochem. Cell Biol.* **150**, 593–605 (2018).
35. Sloan, K. E., Gleizes, P.-E. & Bohnsack, M. T. Nucleocytoplasmic Transport of RNAs and RNA-Protein Complexes. *J. Mol. Biol.* **428**, 2040–2059 (2016).
36. Kimura, M. *et al.* Extensive cargo identification reveals distinct biological roles of the 12 importin pathways. *Elife* **6**, e21184 (2017).
37. Scott, D. D., Aguilar, L. C., Kramar, M. & Oeffinger, M. in *The Biology of mRNA: Structure and Function* **1203**, 33–81, Springer International Publishing (2019).



38. Culjkovic-Kraljacic, B. & Borden, K. L. B. Aiding and abetting cancer: mRNA export and the nuclear pore. *Trends Cell Biol.* **23**, 328–335 (2013).
39. Wegener, M. & Müller-McNicoll, M. Nuclear retention of mRNAs - quality control, gene regulation and human disease. *Semin. Cell Dev. Biol.* **79**, 131–142 (2018).
40. Quan, Y., Ji, Z.-L., Wang, X., Tartakoff, A. M. & Tao, T. Evolutionary and transcriptional analysis of karyopherin beta superfamily proteins. *Mol. Cell Proteomics* **7**, 1254–1269 (2008).
41. Ori, A. *et al.* Cell type-specific nuclear pores: a case in point for context-dependent stoichiometry of molecular machines. *Mol. Syst. Biol.* **9**, 648–648 (2013).
42. Sakuma, S. & D'Angelo, M. A. The roles of the nuclear pore complex in cellular dysfunction, aging and disease. *Semin. Cell Dev. Biol.* **68**, 72–84 (2017).
43. Griffis, E. R., Xu, S. & Powers, M. A. Nup98 localizes to both nuclear and cytoplasmic sides of the nuclear pore and binds to two distinct nucleoporin subcomplexes. *Mol. Biol. Cell* **14**, 600–610 (2003).
44. Fontoura, B. M., Blobel, G. & Matunis, M. J. A conserved biogenesis pathway for nucleoporins: proteolytic processing of a 186-kilodalton precursor generates Nup98 and the novel nucleoporin, Nup96. *J. Cell Biol.* **144**, 1097–1112 (1999).
45. Luschnig, S. *et al.* An F1 genetic screen for maternal-effect mutations affecting embryonic pattern formation in *Drosophila melanogaster*. *Genetics* **167**, 325–342 (2004).
46. Savas, J. N., Toyama, B. H., Xu, T., Yates, J. R. & Hetzer, M. W. Extremely long-lived nuclear pore proteins in the rat brain. *Science* **335**, 942–942 (2012).

47. Breuer, M. & Ohkura, H. A negative loop within the nuclear pore complex controls global chromatin organization. *Genes Dev.* **29**, 1789–1794 (2015).
48. Boeynaems, S. *et al.* Drosophila screen connects nuclear transport genes to DPR pathology in c9ALS/FTD. *Sci. Rep.* **6**, 20877 (2016).
49. Jahanshahi, M., Hsiao, K., Jenny, A. & Pfleger, C. M. The Hippo Pathway Targets Rae1 to Regulate Mitosis and Organ Size and to Feed Back to Regulate Upstream Components Merlin, Hippo, and Warts. *PLoS Genet.* **12**, e1006198 (2016).
50. Mackmull, M.-T. *et al.* Landscape of nuclear transport receptor cargo specificity. *Mol. Syst. Biol.* **13**, 962 (2017).
51. Mira, H. *et al.* Signaling through BMPR-IA regulates quiescence and long-term activity of neural stem cells in the adult hippocampus. *Cell Stem Cell* **7**, 78–89 (2010).
52. Blomfield, I. M. *et al.* Id4 promotes the elimination of the pro-activation factor Ascl1 to maintain quiescence of adult hippocampal stem cells. *Elife* **8**, 271 (2019).
53. Knobloch, M. *et al.* Metabolic control of adult neural stem cell activity by Fasn-dependent lipogenesis. *Nature* **493**, 226–230 (2013).
54. Martynoga, B. *et al.* Epigenomic enhancer annotation reveals a key role for NFIX in neural stem cell quiescence. *Genes Dev.* **27**, 1769–1786 (2013).
55. Linnarsson, S. Sequencing Single Cells Reveals Sequential Stem Cell States. *Cell Stem Cell* **17**, 251–252 (2015).
56. Shin, J. *et al.* Single-Cell RNA-Seq with Waterfall Reveals Molecular Cascades underlying Adult Neurogenesis. *Cell Stem Cell* **17**, 360–372 (2015).

57. Dulken, B. W., Leeman, D. S., Boutet, S. C., Hebestreit, K. & Brunet, A. Single-Cell Transcriptomic Analysis Defines Heterogeneity and Transcriptional Dynamics in the Adult Neural Stem Cell Lineage. *Cell Rep.* **18**, 777–790 (2017).
58. Kalamakis, G. *et al.* Quiescence Modulates Stem Cell Maintenance and Regenerative Capacity in the Aging Brain. *Cell* **176**, 1407–1419 (2019).
59. Mizrak, D. *et al.* Single-Cell Analysis of Regional Differences in Adult V-SVZ Neural Stem Cell Lineages. *Cell Rep.* **26**, 394–406 (2019).
60. Ravasi, T. *et al.* Experimental validation of the regulated expression of large numbers of non-coding RNAs from the mouse genome. *Genome Res.* **16**, 11–19 (2006).
61. Cabili, M. N. *et al.* Integrative annotation of human large intergenic noncoding RNAs reveals global properties and specific subclasses. *Genes Dev.* **25**, 1915–1927 (2011).
62. Dayon, L. *et al.* Relative quantification of proteins in human cerebrospinal fluids by MS/MS using 6-plex isobaric tags. *Anal. Chem.* **80**, 2921–2931 (2008).
63. Morrow, C. S. *et al.* Vimentin Coordinates Protein Turnover at the Aggresome during Neural Stem Cell Quiescence Exit. *Cell Stem Cell* **26**, 558–568 (2020).
64. Carmody, S. R. & Wenthe, S. R. mRNA nuclear export at a glance. *J. Cell Sci.* **122**, 1933–1937 (2009).
65. Chow, E. Y.-C., Zhang, J., Qin, H. & Chan, T.-F. Characterization of Hepatocellular Carcinoma Cell Lines Using a Fractionation-Then-Sequencing Approach Reveals Nuclear-Enriched HCC-Associated lncRNAs. *Front. Genet.* **10**, 1081 (2019).

66. Li, S. *et al.* An intrinsic mechanism controls reactivation of neural stem cells by spindle matrix proteins. *Nat. Commun.* **8**, 122 (2017).
67. Yue, L., Wan, R., Luan, S., Zeng, W. & Cheung, T. H. Dek Modulates Global Intron Retention during Muscle Stem Cells Quiescence Exit. *Dev. Cell* **53**, 661–676 (2020).
68. Katz, S. *et al.* A Nuclear Role for miR-9 and Argonaute Proteins in Balancing Quiescent and Activated Neural Stem Cell States. *Cell Rep.* **17**, 1383–1398 (2016).
69. Martinez, I. *et al.* An Exportin-1-dependent microRNA biogenesis pathway during human cell quiescence. *Proc. Natl. Acad. Sci. U.S.A.* **114**, E4961–E4970 (2017).
70. Lai, S.-L. & Doe, C. Q. Transient nuclear Prospero induces neural progenitor quiescence. *Elife* **3**, (2014).
71. Joy, T., Hirono, K. & Doe, C. Q. The RanGEF Bjl promotes prospero nuclear export and neuroblast self-renewal. *Dev. Neurobiol.* **75**, 485–493 (2015).

## Methods

***Drosophila melanogaster* genetics.** Flies were mutagenised and screened as published<sup>72,73</sup>. MARCM clones<sup>74</sup> were induced as described<sup>73</sup> using *y,w,hs-FLP<sup>1.22</sup>;tub-GAL4,UAS-NLS::GFP::6xmyc;FRT82B,tubP-GAL80<sup>LL3</sup>/(TM6B)* (gift from G. Struhl). RNAi was performed in conjunction with *UAS-Dcr2<sup>75</sup>* and stocks were obtained from the Transgenic RNAi Project at Harvard Medical School, Vienna *Drosophila* Resource Centre (VDRC), the Japanese National Institute of Genetics (NIG) and Bloomington *Drosophila* Resource Center (BDRC); deficiency<sup>76,77</sup> and balancer stocks, *UAS-mCD8::GFP, UAS-Dcr2* and *w; tub-GAL80<sup>ts</sup>* were also obtained from the BDRC. The

following additional strains were used: *grh-GAL4*<sup>18</sup> and *UAS-mira::3xGFP*<sup>73</sup> to visualise a subset of NSCs; *NP3537-GAL4*<sup>78</sup> (NIG) for pan-NSC RNAi.

**Rearing and staging of *Drosophila*.** For larval genotyping, lethal chromosomes were re-established over balancer chromosomes marked by Dfd-YFP. For larval staging experiments, crosses were performed in cages with grape juice plates (25 % (v/v) grape juice, 1.25 % (w/v) sucrose, 2.5 % (w/v) agar) supplemented with live yeast paste. Larvae hatched within 2 h at 25°C were transferred to our standard cornmeal food (8 % (w/v) glucose, 2 % (w/v) cornmeal, 5 % (w/v) baker's yeast, 0.8 % (w/v) agar in water) and placed at the desired temperature. Early larvae were newly-hatched and late larvae were at wandering stage. Data from males or females of the same genotype were pooled without distinction.

**Tissue/cell collection, and cell culture.** *Drosophila* or mouse tissue/cells were prepared and cultured as published<sup>52,72,79</sup>. Differences were that for mouse cells the medium for aNSCs was additionally supplemented with 20 ng/ml recombinant murine Epidermal Growth Factor (PeproTech 315-09) and qNSC induction was performed with 50 ng/ml BMP4 (R&D Systems 5020-BP-010). qNSCs cultures were never passaged. *Nestin-GFP* mice<sup>80</sup> (n=3) were used for *in vivo* NSC analysis. Umbilical cord blood derived HSCs were extracted and processed as previous published<sup>81</sup>. Immunophenotypic HSCs were defined as Lin<sup>-</sup>/CD34<sup>+</sup>/CD38<sup>-</sup>/CD45RA<sup>-</sup>/CD90<sup>+</sup>/CD49f<sup>+</sup>, where Lin is Human Lineage Cocktail 1 (CD3, CD14, CD16, CD19, CD20, CD56); sorted by an Aria cytometer (BD Biosciences). For all flow cytometry, cells were initially identified based on forward and side scatters. Dead cells were excluded based on staining with 4',6-diamidino-2-phenylindole (DAPI).

**EdU labelling, oligo(dT) fluorescent *in situ* hybridisation (FISH) and Immunofluorescence.** Tissue/cells were incubated in 10 mM EdU (ThermoFisher

C10340) in medium (*Drosophila* CNSs for 2 h in Schneider's Insect Medium; mouse NSCs for 6 h in aNSC or qNSC media described above). Samples were processed for EdU detection according to the manufacturer's instructions (ThermoFisher Click-iT EdU Imaging Kit). For combined EdU and other stains these were performed before EdU colour reaction. For FISH of *Drosophila* tissue or mouse cultured cells, samples fixed as usual were permeabilised in cold Methanol for 10 min, rehydrated in 70 % Ethanol for at least 10 min followed by 1 M Tris-hydroxymethyl-aminomethane (Tris) buffer (pH 8.0) for 5 min. For FISH of mouse tissue, 40 µm coronal sections first underwent heat-mediated antigen retrieval at 95 °C for 10 min in 10 mM Saline-Sodium Citrate buffer (SSC) (pH 6.0). For all samples, hybridisation was performed with 1 ng/µl Cy3-Oligo-dT(50) (Genelink, 26-4322-02) in 2x SSC containing 1 mg/ml yeast tRNA, 0.005 % Bovine Serum Albumin, 10 % Dextran Sulfate and 25 % deionised Formamide; for at least 2 h at 37 °C in a humidified chamber. Samples were washed once in 4x SSC and twice in 2x SSC. For combined FISH and immunofluorescence, FISH was performed before primary antibody incubation in 2x SSC, 0.1 % TritonX-100 (with 5 % donkey serum for mouse tissue, all other samples, no serum) and subsequent steps in 2x SSC. When performing immunofluorescence alone or with EdU, this was performed as published<sup>{19,52,72,79}</sup> with additional primary antibodies: rabbit anti-Dcp-1 (Cell Signalling 95785), rabbit anti-cleaved Caspase-3 (Cell Signalling Technology 9664), rabbit anti-Nup98 (Cell Signalling Technology 2598), rabbit anti-Nup214 (Abxex abx129466), rabbit anti-Nup54 (Novus NBP1-85899), mouse anti-Nup133 (Novus H00055746-M02), rabbit anti-Nup43 (Novus NBP1-88792), rabbit anti-Ndc1 (Novus NBP1-91603). Antibodies used for fluorescence-activated cell sorting were: anti-Human Lineage Cocktail (BD Biosciences 340546), anti-CD34 (BD Biosciences 8G12), anti-CD38 (eBioscience HB7), anti-CD45 (Biolegend HI30), hCD45RA (eBioscience HI100), anti-CD90 (BD Biosciences 5E10), anti-CD49f (BD Biosciences GoH3).

**Imaging and image analyses.** Fluorescence samples were scanned with Zeiss 510 or 800, or Leica SP5 or SP8 scanning confocal microscopes. Optical section steps ranged from 0.1 to 2  $\mu\text{m}$  with picture size of  $1,024 \times 1,024$  pixels. Images were processed and arranged using Fiji/ImageJ, Adobe Illustrator, Adobe Photoshop CS5, and/or PowerPoint software. *Drosophila* cell counts were carried out with ImageJ Cell Counter plugin; when qNSC fibres were observed 10 brain lobes were quantified per genotype, when not observed it was 4 lobes (a single lobe per animal). Cell culture images were acquired from 3 random fields from each of 3 coverslips; their counts, image masking, projecting and reformatting were performed with CellProfiler scripts. Poly(dT) intensity per area was determined for nucleus or cytoplasm from SUM projections when the whole cell could be imaged, or from single optical sections of mouse hippocampus (where dense cell packing and sectioning precluded imaging entire cells). No data points were excluded. Graphpad Prism software was used for statistics and graphs.

**Lentivirus preparation and titration.** Lentiviruses were produced in 293FT using standard procedures and titrated as published<sup>82</sup>. To deplete Nup98, NSCs were grown for 24 h, infected with 2.5 M.O.I. Nup98 shRNA lentivirus and fixed 0 or 2 d post-infection.

**Protein extraction, Western blots and proteomics.** Cells were washed with ice-cold PBS and scraped. Protein lysates were prepared as published<sup>52</sup> and concentration determined using Pierce BCA Protein Assay kit (ThermoFischer Scientific 23225). Western blots were performed and quantified as published<sup>52</sup>. Antibodies used were all from Novus: rabbit anti-Nup50 (NBP2-19610), rabbit anti-Nup210 (NB100-93336), rabbit anti-Nup93 (NBP1-81546), rabbit anti-Nup62 (NBP1-31381), rabbit anti-Nup35 (NB100-93322), rabbit anti-Nup188 (NBP1-28717), mouse anti-Nup358 (NB100-74480), rabbit anti-Pom121 (NBP2-19890). Proteomic analyses were performed on 50

µg total protein per timepoint. Samples were Acetone-precipitated overnight followed by Trypsin digestion using the PreOmics iST-NHS sample preparation kit<sup>83</sup>, labelled using 0.2 mg TMT 10-plex Isobaric Label Reagents (Thermo Scientific) and checked to ensure >99 % labelling efficiency. Equal volumes of all ten labelled samples were mixed to produce a single mixed sample which was subject to high pH (HpH) reversed-phase peptide fractionation (Pierce). Nine HpH fractions were each analysed on a 145 min U3000 HPLC method. Samples were loaded in 2 % Acetonitrile, 0.05 % Trifluoroacetic acid onto a C18 trap column, then transferred onto an EasySpray 50 cm × 75 µm column. Peptides were separated by elution using the following conditions: 15 min 3-9 % mobile phase A (0.1 % Formic acid, 5 % Dimethyl Sulfoxide (DMSO)), 90 min 9-30 %, 15 min 30-50 %, 5 min 99 % and ending with 15 min at 3 %. Mobile phase B was 80 % Acetonitrile, 5 % DMSO, 0.1 % Formic acid. An SPS-MS3 method on an Orbitrap Fusion Tribrid mass spectrometer (Thermo Fisher Scientific) acquired data with settings: MS1 orbitrap, resolution 120 K, scan range 375-1500 m/z, maximum injection time 50 ms, AGC target 4E5, normalized AGC target 100 %, microscans 1, RF lens 30 %, profile data, MIPS mode peptide, charge states 2-6 included, dynamic exclusion 60 s +/- 10 ppm. MS2 ion trap, quadrupole isolation mode, 1.2 isolation window, CID activation, 35 % collision energy, activation time 10 ms, activation Q 0.25, turbo scan rate, maximum injection time 50 ms, AGC target 1E4, normalised AGC target 100 %, microscans 1, centroid data, filter precursor selection range MSn 400-1200 m/z. MS3 orbitrap scan event 1 for charge state 2, quadrupole isolation mode, 1.3 isolation window, Multi-notch Isolation True, MS2 Isolation Window (m/z) 2, number of Notches 5, activation type HCD, collision energy 65 %, orbitrap resolution 50K, scan range 100-500 m/z, maximum injection time 105 ms, AGC target 1E5, normalized AGC target 200 %, microscans 1, centroid data. MS3 orbitrap scan event 2 for charge state 3 as above but with number of Notches 10. MS3 orbitrap scan event 3 for charge states 4-6 as above but with number of



Notches 10. Raw data were analysed in MaxQuant<sup>84</sup> (v1.6.12.0) against a SwissProt *Mus musculus* protein database containing 17,482 protein entries (downloaded May 2020). TMT10plex quantification was selected (modification at Lysine and peptide N-terminal amino groups) along with variable modification of Methionine oxidation and N-terminal acetylation. A fixed Cysteine modification of +113.084 Da (specific to the iST-NHS kit) was added. Further data analyses were performed in Perseus<sup>85</sup> (v1.4.0.2). Common contaminants and proteins identified from decoy sequences were removed. Protein intensities were log<sub>2</sub> transformed, median normalised within each sample and then normalised to Day 0. GO terms were simplified using REVIGO<sup>86</sup> with allowed similarity of 0.7.

**Cell fractionation, nuclei acid extraction, sequencing and analyses.** *Drosophila* genomic DNA was extracted according to standard methods and the identity of the genetic lesion determined by sequencing exons of heterozygous *FRT82B/FRT82B, 2V327* animals. This sequencing was outsourced to Eurofins Genomics using primers designed with A Plasmid Editor software. Mouse cell nucleocytoplasmic fractionation and RNA isolation was performed with the PARIS kit (ThermoFisher AM1921) according to the manufacturer's instructions plus an additional ethanol precipitation step and rehydrated in nuclease-free water. Fractionation quality was verified by quantitative reverse-transcriptase polymerase chain reaction as published<sup>87</sup>. Subsequent steps for next generation sequencing were performed as published<sup>52</sup> and sequencing was performed with 75 bp single-end reads with a depth of 50 million reads per sample. Raw reads were quality and adapter trimmed using cutadapt-1.9.1 software<sup>88</sup> then aligned and quantified using RSEM-1.3.0/STAR-2.5.2<sup>89,90</sup> against the mouse genome GRCm38 and annotation release 89, both from Ensembl. Differential gene expression analysis was performed in R-3.6.1 (R Core Team, 2019) using the DESeq2 package<sup>91</sup> (version 1.24.0). Normalisation and variance-stabilising transformation was applied on raw counts before

performing PCA and Euclidean distance-based clustering. Significantly differential genes were always selected using a 0.05 false-discovery rate threshold. Size factors in DESeq2 were calculated based on the summed cytoplasmic and nuclear counts for each paired sample set to reconcile technical differences between samples whilst count differences between subcellular compartments within the same paired sample set were maintained for all genes. We performed pairwise comparisons between subcellular compartments on each day (within day comparison) and between the subcellular distribution across days (between days) using the following formula:  $\sim \text{days\_in\_BMP} + \text{subcellular\_compartment} + \text{days\_in\_BMP}:\text{subcellular\_compartment} + \text{days\_in\_BMP}:\text{pair\_within\_day}$ . Additionally, we performed a likelihood ratio test in DESeq2 to identify the genes that changed subcellular distribution across time (reduced design formula in DESeq2:  $\sim \text{days\_in\_BMP} + \text{subcellular\_compartment} + \text{days\_in\_BMP}:\text{pair\_within\_day}$ ). Scatterplots were prepared using ggplot2 (version 3.2.1) to visualise IR as one intron per gene, selecting the one with the biggest absolute change in IR value. Violin plots were prepared using ggplot2 (version 3.2.1) using the log<sub>2</sub> fold changes for all genes after pairwise comparisons between days. Gene set enrichment analyses were performed using ClusterProfiler (version 3.12.0<sup>92</sup>) using the enrichGO() function for enrichment of biological process gene ontology terms.

### **Data Availability**

FracRNA-seq data is deposited in the Gene Expression Omnibus data repository and available under GSE162047.

### **Code Availability**

Code is available upon request.

## Methods References

72. Slack, C., Somers, W. G., Sousa-Nunes, R., Chia, W. & Overton, P. M. A mosaic genetic screen for novel mutations affecting *Drosophila* neuroblast divisions. *BMC Genet.* **7**, 33 (2006).
73. Sousa-Nunes, R., Chia, W. & Somers, W. G. Protein phosphatase 4 mediates localization of the Miranda complex during *Drosophila* neuroblast asymmetric divisions. *Genes Dev.* **23**, 359–372 (2009).
74. Lee, T. & Luo, L. Mosaic analysis with a repressible cell marker for studies of gene function in neuronal morphogenesis. *Neuron* **22**, 451–461 (1999).
75. Dietzl, G. *et al.* A genome-wide transgenic RNAi library for conditional gene inactivation in *Drosophila*. *Nature* **448**, 151–156 (2007).
76. Ryder, E. *et al.* The DrosDel collection: a set of P-element insertions for generating custom chromosomal aberrations in *Drosophila melanogaster*. *Genetics* **167**, 797–813 (2004).
77. Parks, A. L. *et al.* Systematic generation of high-resolution deletion coverage of the *Drosophila melanogaster* genome. *Nat. Genet.* **36**, 288–292 (2004).
78. Hayashi, S. *et al.* GETDB, a database compiling expression patterns and molecular locations of a collection of Gal4 enhancer traps. *Genesis* **34**, 58–61 (2002).
79. Gnocchi, V. F., White, R. B., Ono, Y., Ellis, J. A. & Zammit, P. S. Further characterisation of the molecular signature of quiescent and activated mouse muscle satellite cells. *PLoS ONE* **4**, e5205 (2009).

80. Mignone, J. L., Kukekov, V., Chiang, A.-S., Steindler, D. & Enikolopov, G. Neural stem and progenitor cells in nestin-GFP transgenic mice. *J. Comp. Neurol.* **469**, 311–324 (2004).
81. Grey, W. *et al.* Activation of the receptor tyrosine kinase, RET, improves long-term hematopoietic stem cell outgrowth and potency. *Blood* (2020).
82. Sena-Esteves, M. & Gao, G. Titration of Lentivirus Vectors. *Cold Spring Harb. Protoc.* **2018**, pdb.prot095695 (2018).
83. Kulak, N. A., Pichler, G., Paron, I., Nagaraj, N. & Mann, M. Minimal, encapsulated proteomic-sample processing applied to copy-number estimation in eukaryotic cells. *Nat. Methods* **11**, 319–324 (2014).
84. Cox, J. & Mann, M. MaxQuant enables high peptide identification rates, individualized p.p.b.-range mass accuracies and proteome-wide protein quantification. *Nat. Biotechnol.* **26**, 1367–1372 (2008).
85. Tyanova, S. *et al.* The Perseus computational platform for comprehensive analysis of (prote)omics data. *Nat. Methods* **13**, 731–740 (2016).
86. Supek, F., Bošnjak, M., Škunca, N. & Šmuc, T. REVIGO summarizes and visualizes long lists of gene ontology terms. *PLoS ONE* **6**, e21800 (2011).
87. Yap, K. *et al.* A Short Tandem Repeat-Enriched RNA Assembles a Nuclear Compartment to Control Alternative Splicing and Promote Cell Survival. *Mol. Cell* **72**, 525–540.e13 (2018).
88. Martin, M. Cutadapt removes adapter sequences from high-throughput sequencing reads. *EMBnet.journal* **17**, 10–12 (2011).

89. Li, B. & Dewey, C. N. RSEM: accurate transcript quantification from RNA-Seq data with or without a reference genome. *BMC Bioinformatics* **12**, 323–16 (2011).
90. Dobin, A. *et al.* STAR: ultrafast universal RNA-seq aligner. *Bioinformatics* **29**, 15–21 (2013).
91. Love, M. I., Huber, W. & Anders, S. Moderated estimation of fold change and dispersion for RNA-seq data with DESeq2. *Genome Biol.* **15**, 550–21 (2014).
92. Yu, G., Wang, L.-G., Han, Y. & He, Q.-Y. clusterProfiler: an R package for comparing biological themes among gene clusters. *OMICS* **16**, 284–287 (2012).

### **Acknowledgements**

We are grateful to W. G. Somers and W. Chia for their contributions at the screening stage of this project; to F. Oozeer; plus R. Goldstone and J. Nicod (The Francis Crick Institute Advanced Sequencing Facility) for technical support; to A. Brand, S. Bray, F. Matsuzaki, C. Petritsch and G. Struhl for flies or antibodies; to the TRiP (NIH/NIGMS R01-GM084947), VDRC, NIG and BDRC stock centres for fly stocks; to Q. Ch'ng, L. Lin, G. Neves, P. Rigo and S. Ultanir for discussions on data analyses. Work in the F.G. laboratory is supported by The Francis Crick Institute, which receives its funding from Cancer Research UK (FC0010089), the UK Medical Research Council (FC0010089) and the Wellcome Trust (FC0010089). This work was funded by a Cancer Research UK Career Development Fellowship to R.S.N. (A14958).

### **Author contributions**

A.C., M.M., A.R., A.M, L.H., A.C., H.F., R.C., P.F. and R.S.N. performed and analysed experiments; W.G. and D.B. provided human HSCs; P.F. and A.P.S. analysed raw

proteomic data; S.S. and G.K. analysed raw fracRNA-seq data; A.R. and L.H. performed further analyses on proteomic and fracRNA-seq; R.S.N. designed and supervised the project, some aspects of which in collaboration with F.G.. R.S.N. wrote the manuscript, which all authors provided input to or approved.

### **Competing interest declaration**

All authors declare no competing financial interests.

### **Additional information**

Correspondence and requests for materials should be addressed to [rita.sousa-nunes@kcl.ac.uk](mailto:rita.sousa-nunes@kcl.ac.uk). Supplementary Information consists of 8 tables.

### **Extended Data**

Extended data consists of 9 figures.

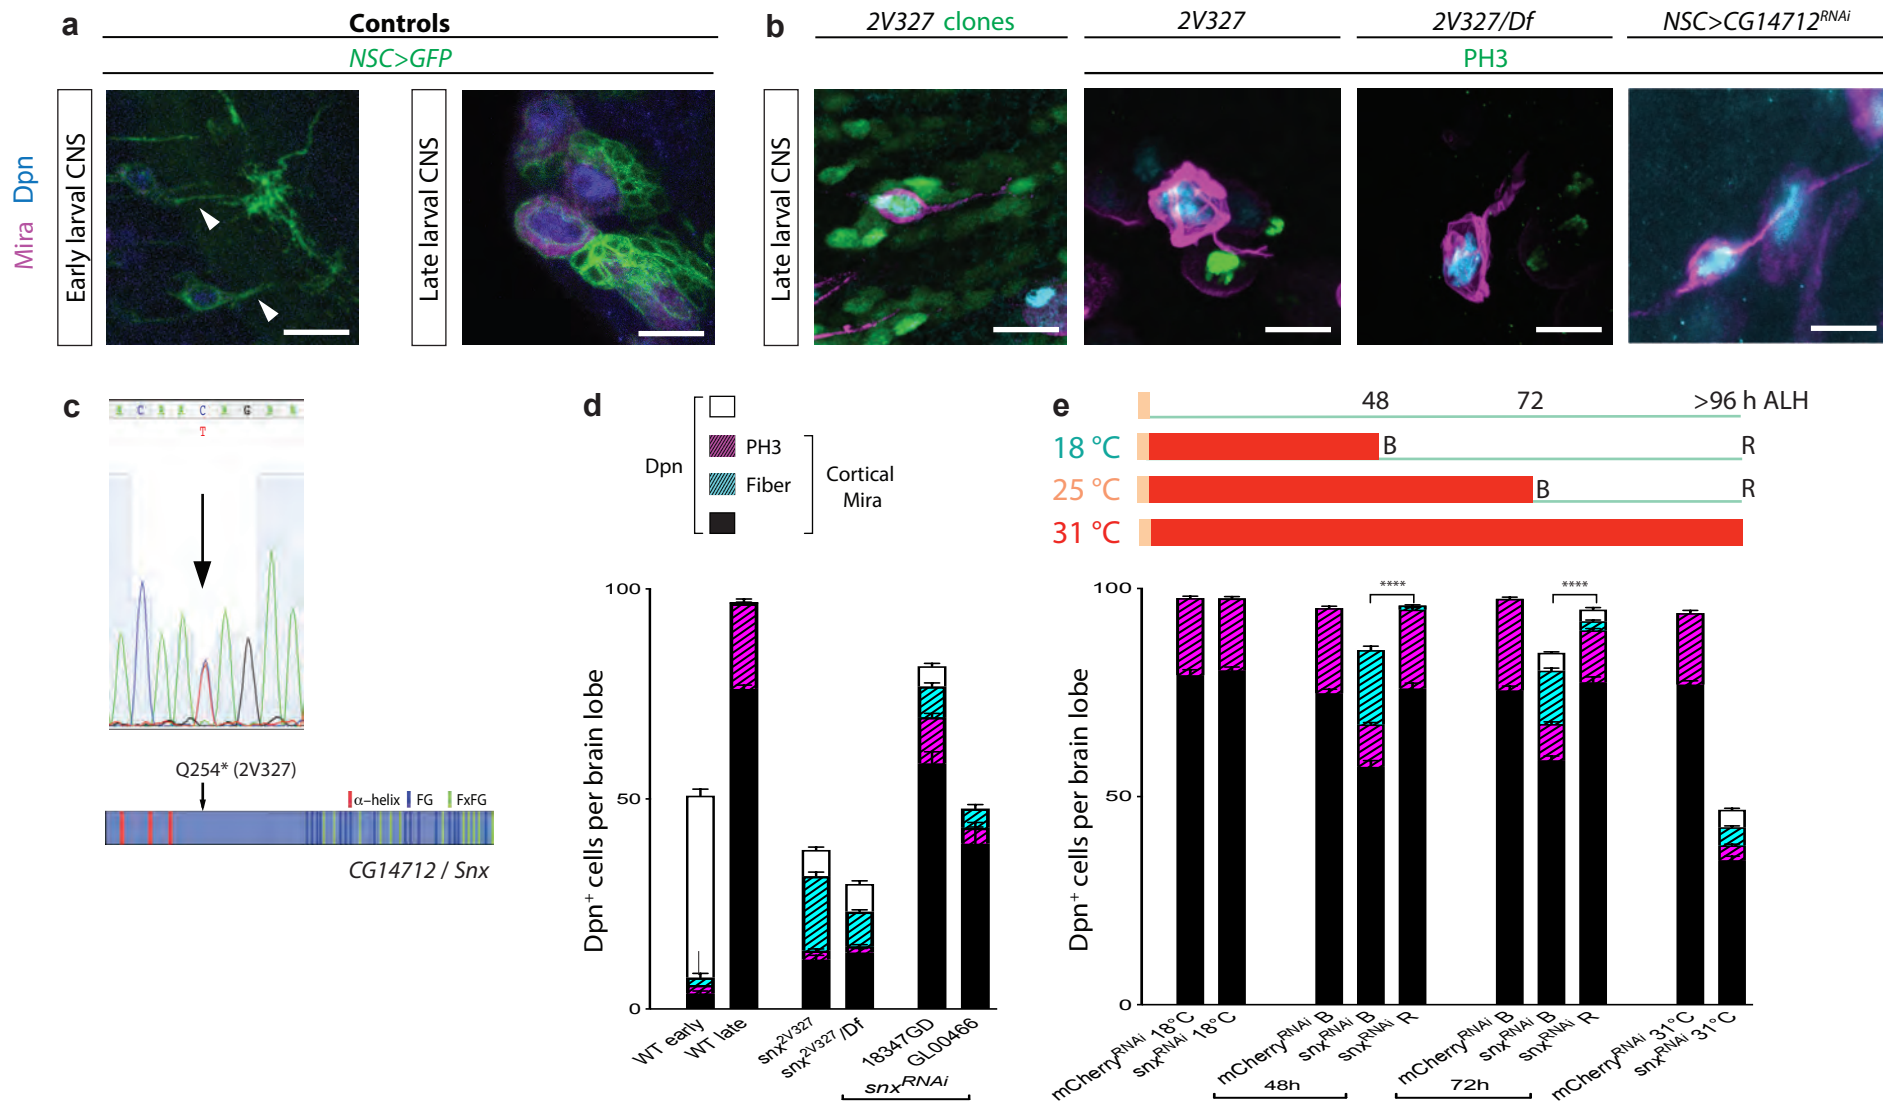

**Fig. 1 | Downregulation of novel *Drosophila* protein CG14712/Snx induces anachronical qNSCs.** **a**, WT qNSCs are present in early but not late larval CNSs, display a cytoplasmic fibre (arrowheads) and downregulate Mira and Dpn. **b**, Late larval NSCs of 2V327 mutant or with CG14712 knock-down (shown is RNAi GL00466) have a morphology reminiscent of qNSCs and are negative for the mitotic marker PH3. Images are maximum intensity projections of a few optical sections; scale bars: 10  $\mu$ m. **c**, 2V327 mutants contain a premature STOP codon at aminoacid position 254 in CG14712/Snx, whose structural motifs are indicated. **d**, Quantification of detectable Dpn<sup>+</sup> cells per brain lobe of early (newly-hatched) and late (third-instar) WT larvae as well as late *snx* mutant and *NSC>snx<sup>RNAi</sup>* larvae (two independent RNAis). Dpn<sup>+</sup> cells were further scored for Mira (black bars – full and hatched) and, within these, for expression of PH3 and presence of a fibre (note that with this marker combination fibres are only revealed if cells express detectable cortical Mira). Histograms represent mean and error bars s.e.m. **e**, Schematic of experimental design to transiently induce RNAi expression in larval NSCs via temperature shifts: none/low at 18 °C and maximal at 31 °C. ‘B’ refers to animals scored Before or after Recovery ‘R’ period (recovery meaning animals placed at 18 °C to abolish RNAi induction); ALH, after larval hatching. Quantifications as per d. Student’s t-test was performed to compare number of Dpn<sup>+</sup> cells in the conditions indicated; \*\*\*\*p<0.0001.

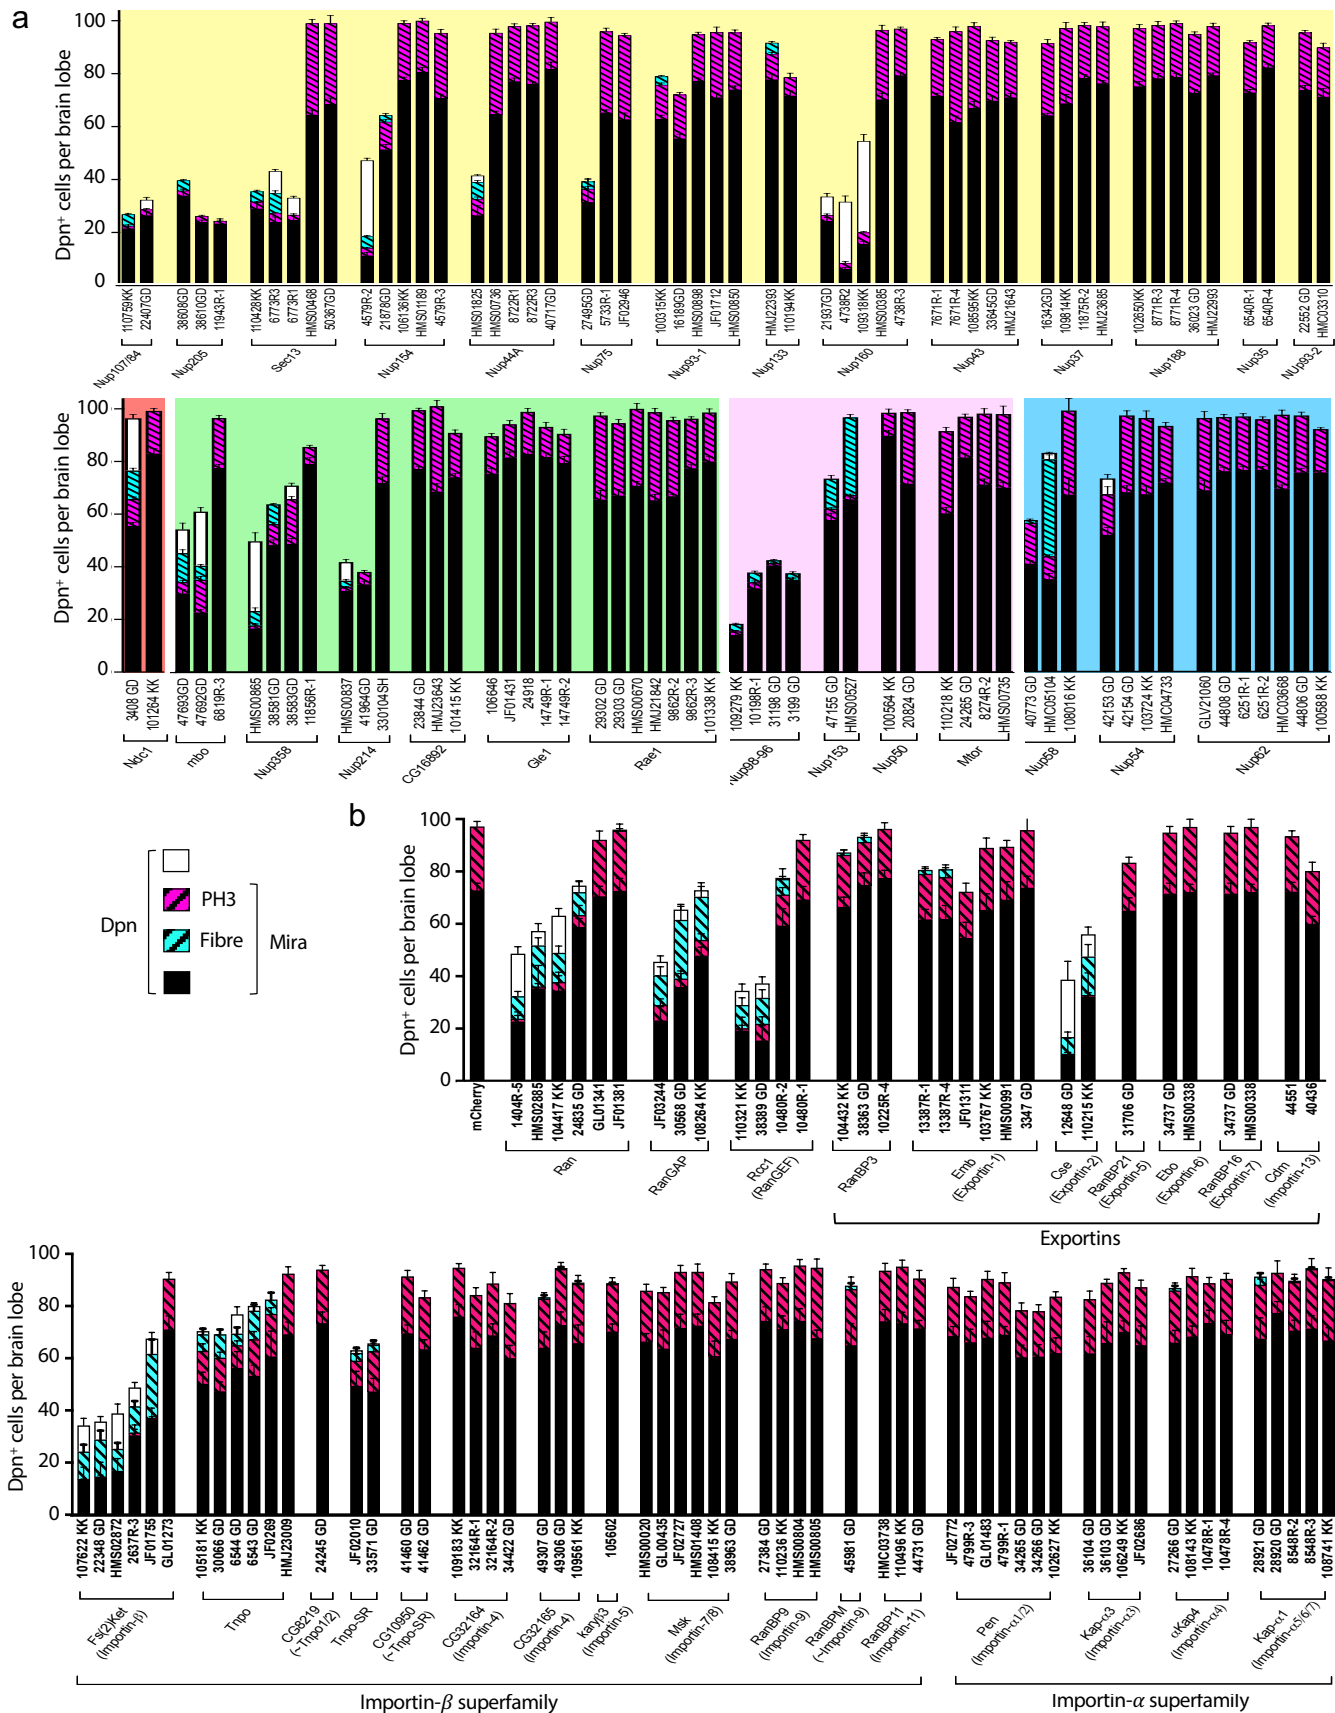

**Fig. 2 | Downregulation of various nucleocytoplasmic transport regulators in *Drosophila* NSCs induces quiescence features anachronically in late larvae. a, Nucleoporins (background colour-coded by structural class – see Extended Data Table 1). b, Ran, its guanine nucleotide exchange factors and karyopherins. Wherever possible, multiple RNAis (each identified under their respective histogram) were used against the same target. Quantifications as per Fig. 1d. Histograms represent mean and error bars s.e.m..**



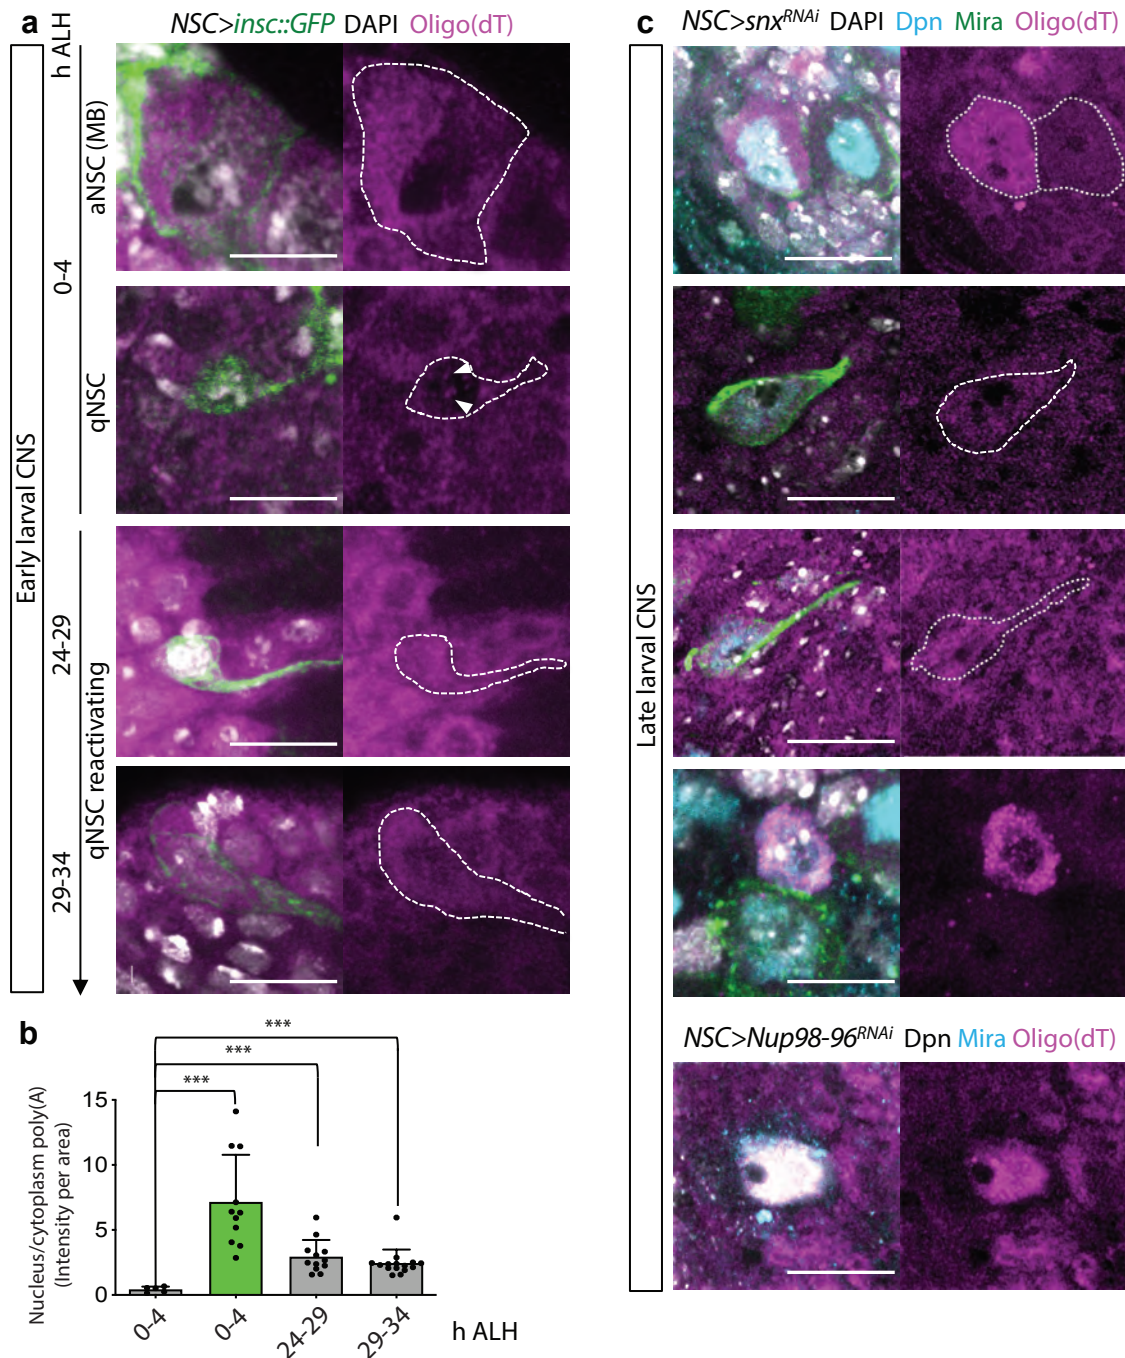

**Fig. 3 | *Drosophila* qNSCs accumulate nuclear poly(A) RNA relative to aNSCs.**

**a**, Permanently active NSCs such as in the mushroom bodies (MB) are larger and contain noticeably more poly(A) RNA than deeply quiescent NSCs. Following the same qNSC over time (across specimen) (Extended Data Fig. 1), revealed gradual increase of poly(A) RNA as reactivation progressed. Arrowheads point at poly(A) RNA accumulations within the nucleoplasm centre. ALH, after larval hatching. **b**, Quantification of nuclear/cytoplasmic ratio of poly(A) RNA in specimen such as those depicted in **a**; values normalized to MB average. Histograms represent mean and error bars s.e.m. Mann-Whitney test,  $**p \leq 0.0005$ . **c**, Nuclear accumulation of poly(A) RNA can be seen in NSCs with Snx or Nup98-96 knockdown, particularly in deeply quiescent NSCs as reported by nuclear Mira. Images are maximum intensity projections of a few optical sections (split magenta channel with hatched outline of NSCs when cell cortex was discernible); scale bars: 10  $\mu\text{m}$ .

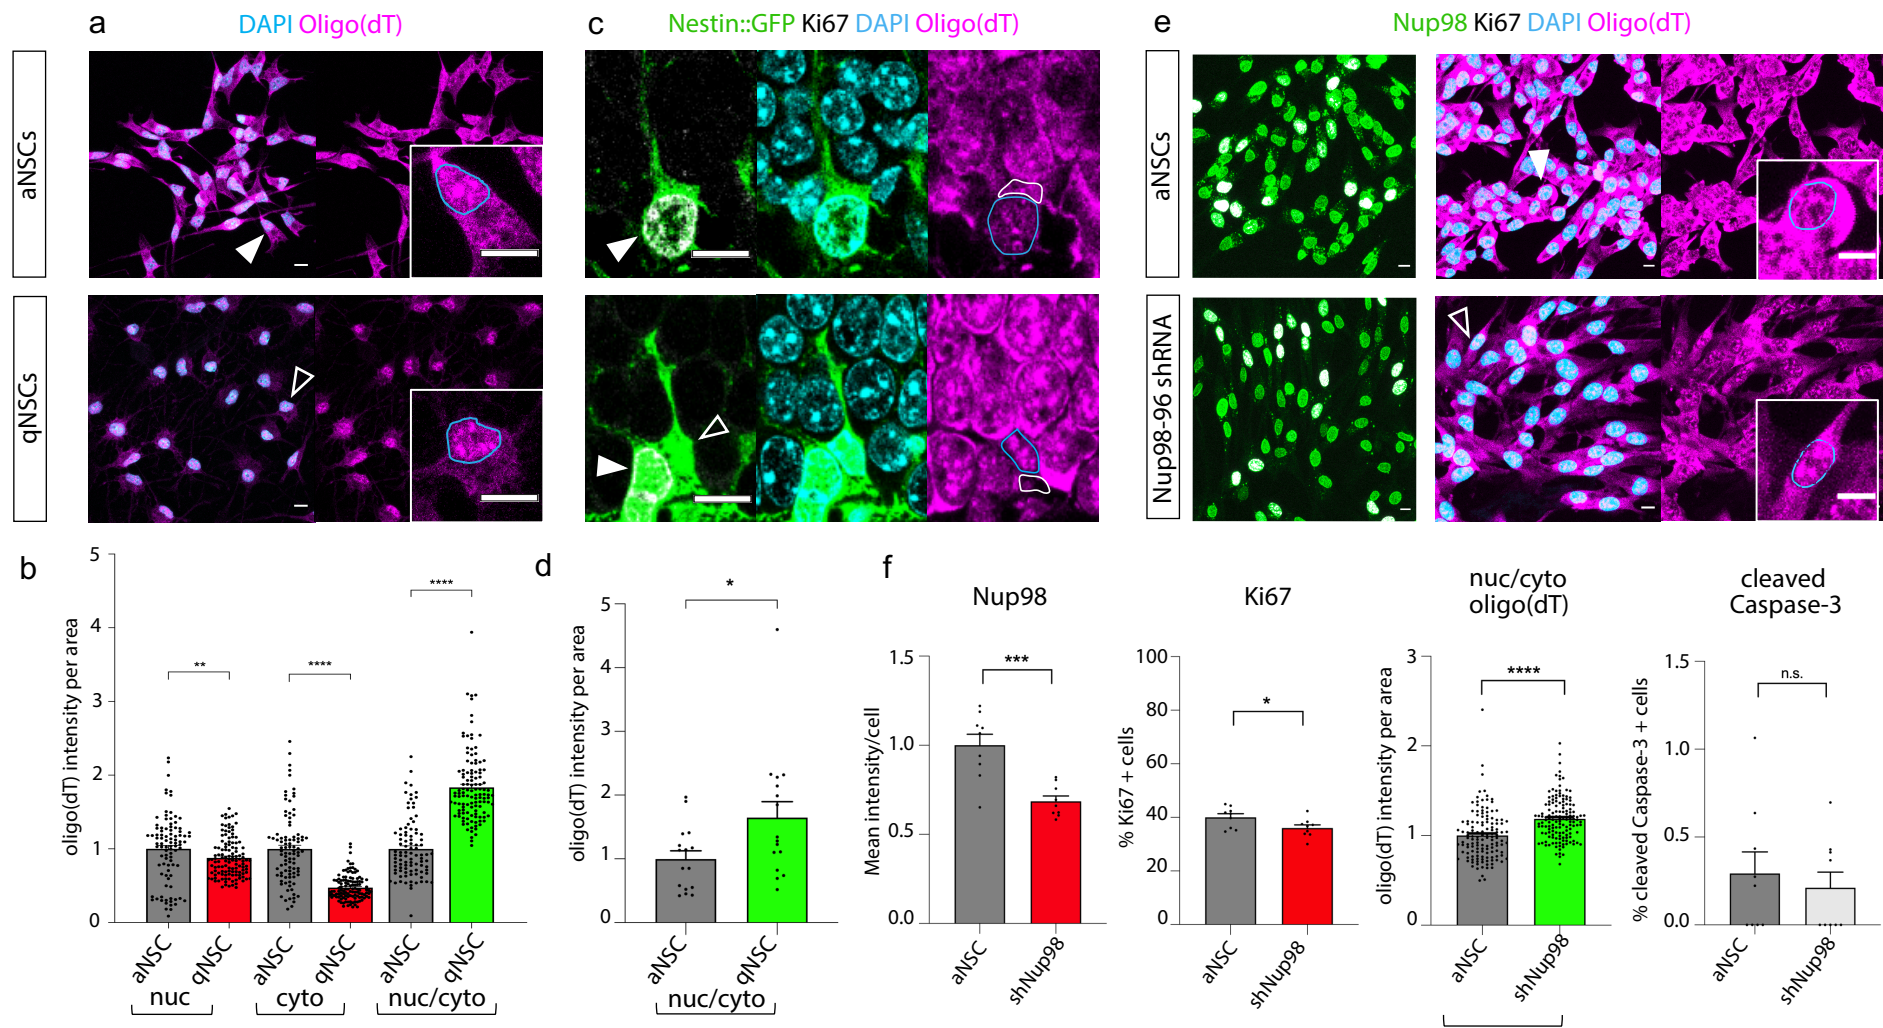

**Fig. 4 | Mouse qNSCs accumulate nuclear poly(A) RNA relative to aNSCs.** **a, e**, Adult mouse adult hippocampal NSC cultures; quiescence induced by BMP4. Insets in **a** are single-channel high-magnification of single cells (arrowheads in low-magnification) with nucleus outlined in blue. **b**, Quantifications from specimen such as those depicted in **a**. Mann-Whitney test, \*\* $p < 0.005$ , \*\*\*\* $p < 0.0001$ . **c**, Adult mouse hippocampal NSCs *in vivo* identified by Nestin::GFP, with active and quiescent identified by presence/absence of Ki67 (filled and open arrowheads, respectively); nuclear and cytoplasmic domains outlined in blue and white, respectively. **d**, Quantifications from specimen such as those depicted in **c**; Mann-Whitney test, \* $p < 0.05$ . **e**, Nup98-96 shRNA induces quiescence features such as less Ki67 positive cells and nuclear accumulation of poly(A) RNA. **f**, Quantifications from specimen such as those depicted in **e**; Mann-Whitney test, \*\*\*\* $p < 0.0001$ . Images are maximum intensity projections of a few optical sections; scale bars: 10 $\mu$ m. Histograms represent mean and error bars s.e.m. of values normalised to respective aNSC average.

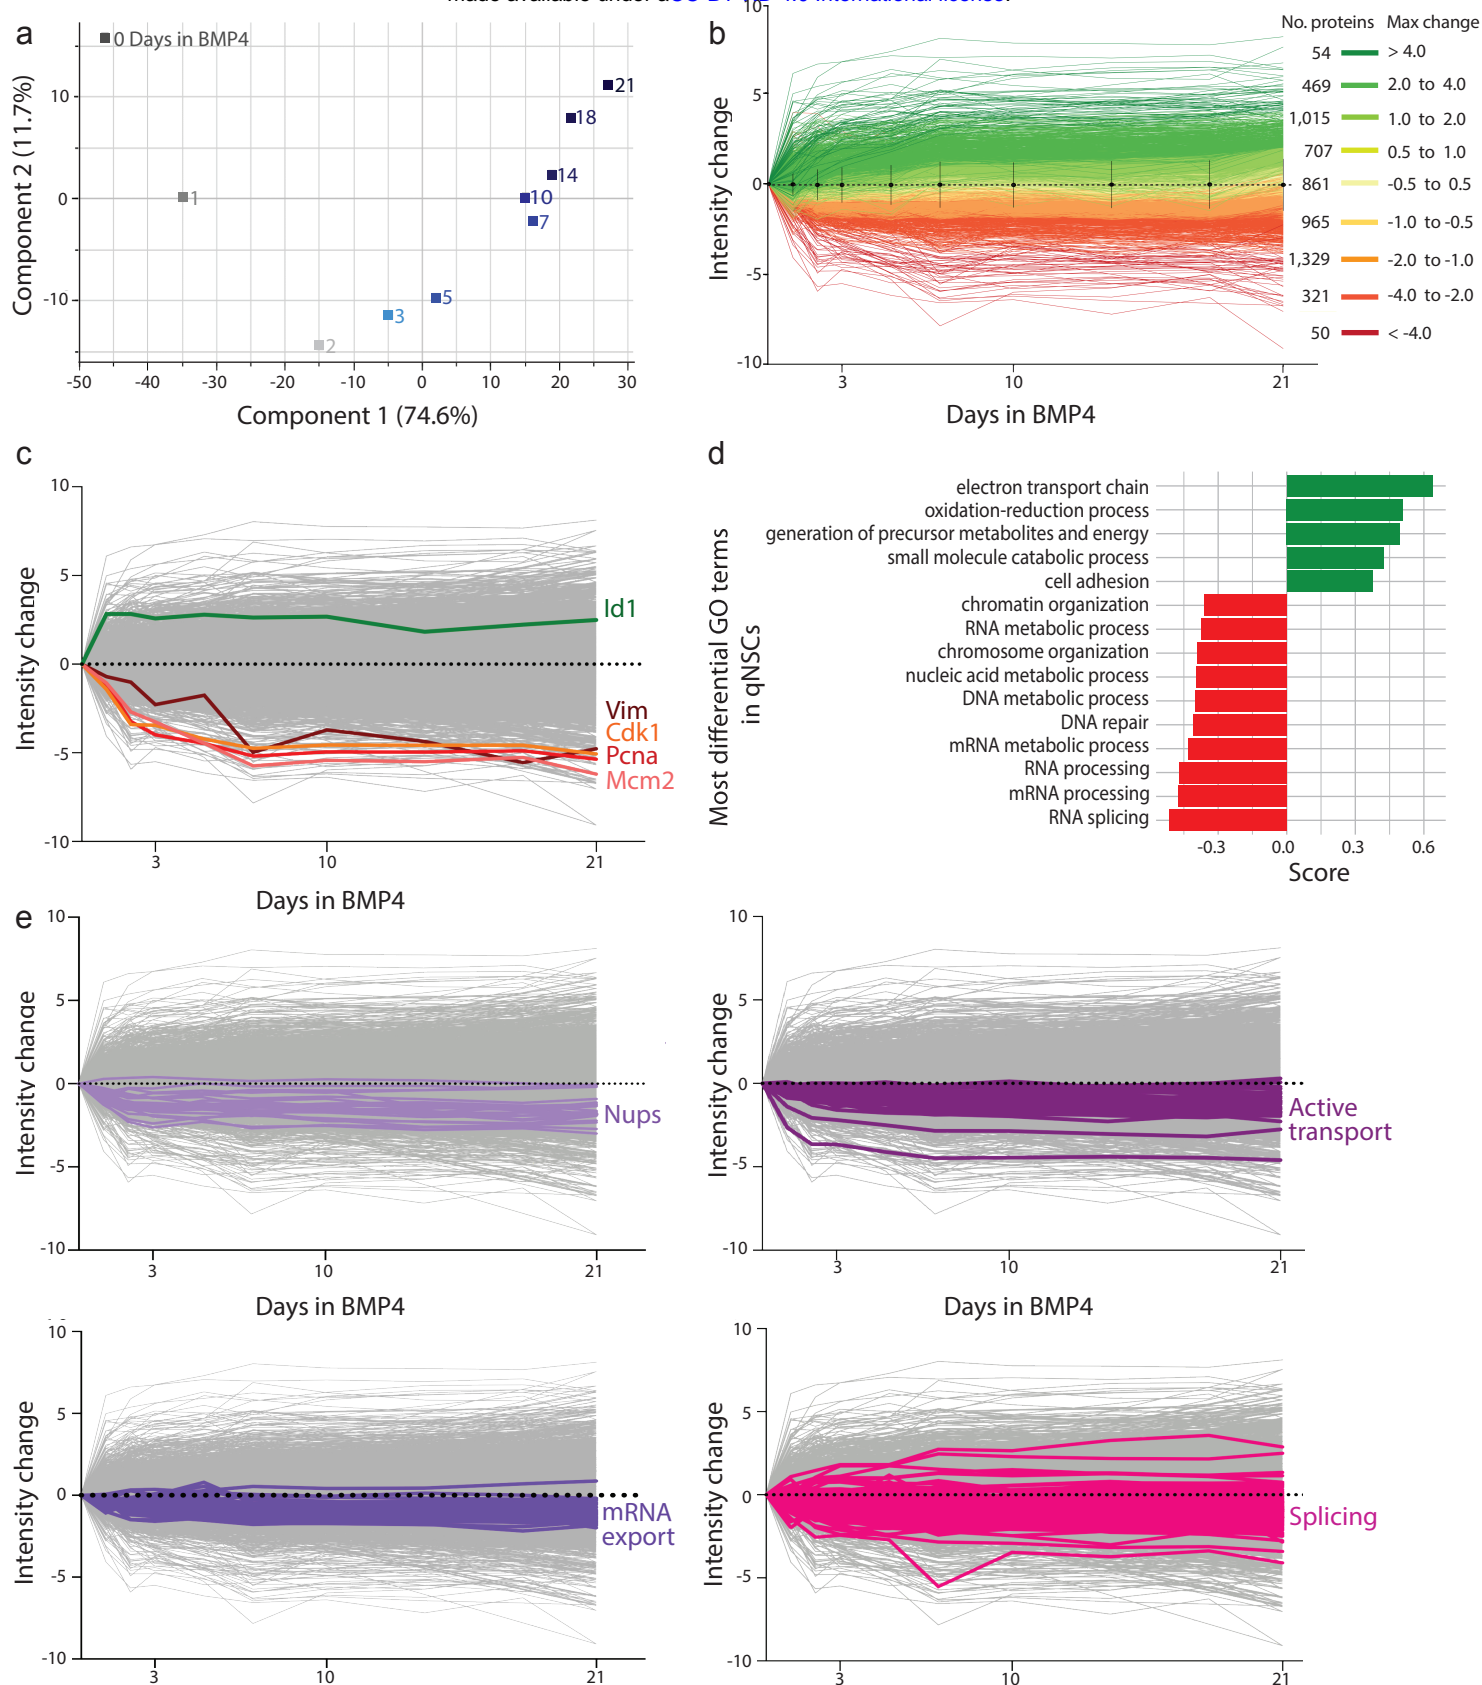

**Fig. 5 | Proteome changes as NSCs transition between active and deeper quiescence states. a**, PCA plot. **b**, TMT protein intensity changes (difference, arbitrary units) from Day 0 (aNSCs); mean and S.D. indicated for each time-point. **c**, Control proteins plotted on background of all. **d**, Most upregulated (5, green) and down-regulated (10, red) biological process GO terms in qNSCs relative to aNSCs. **e**, Change of specified categories of proteins plotted on background of all.

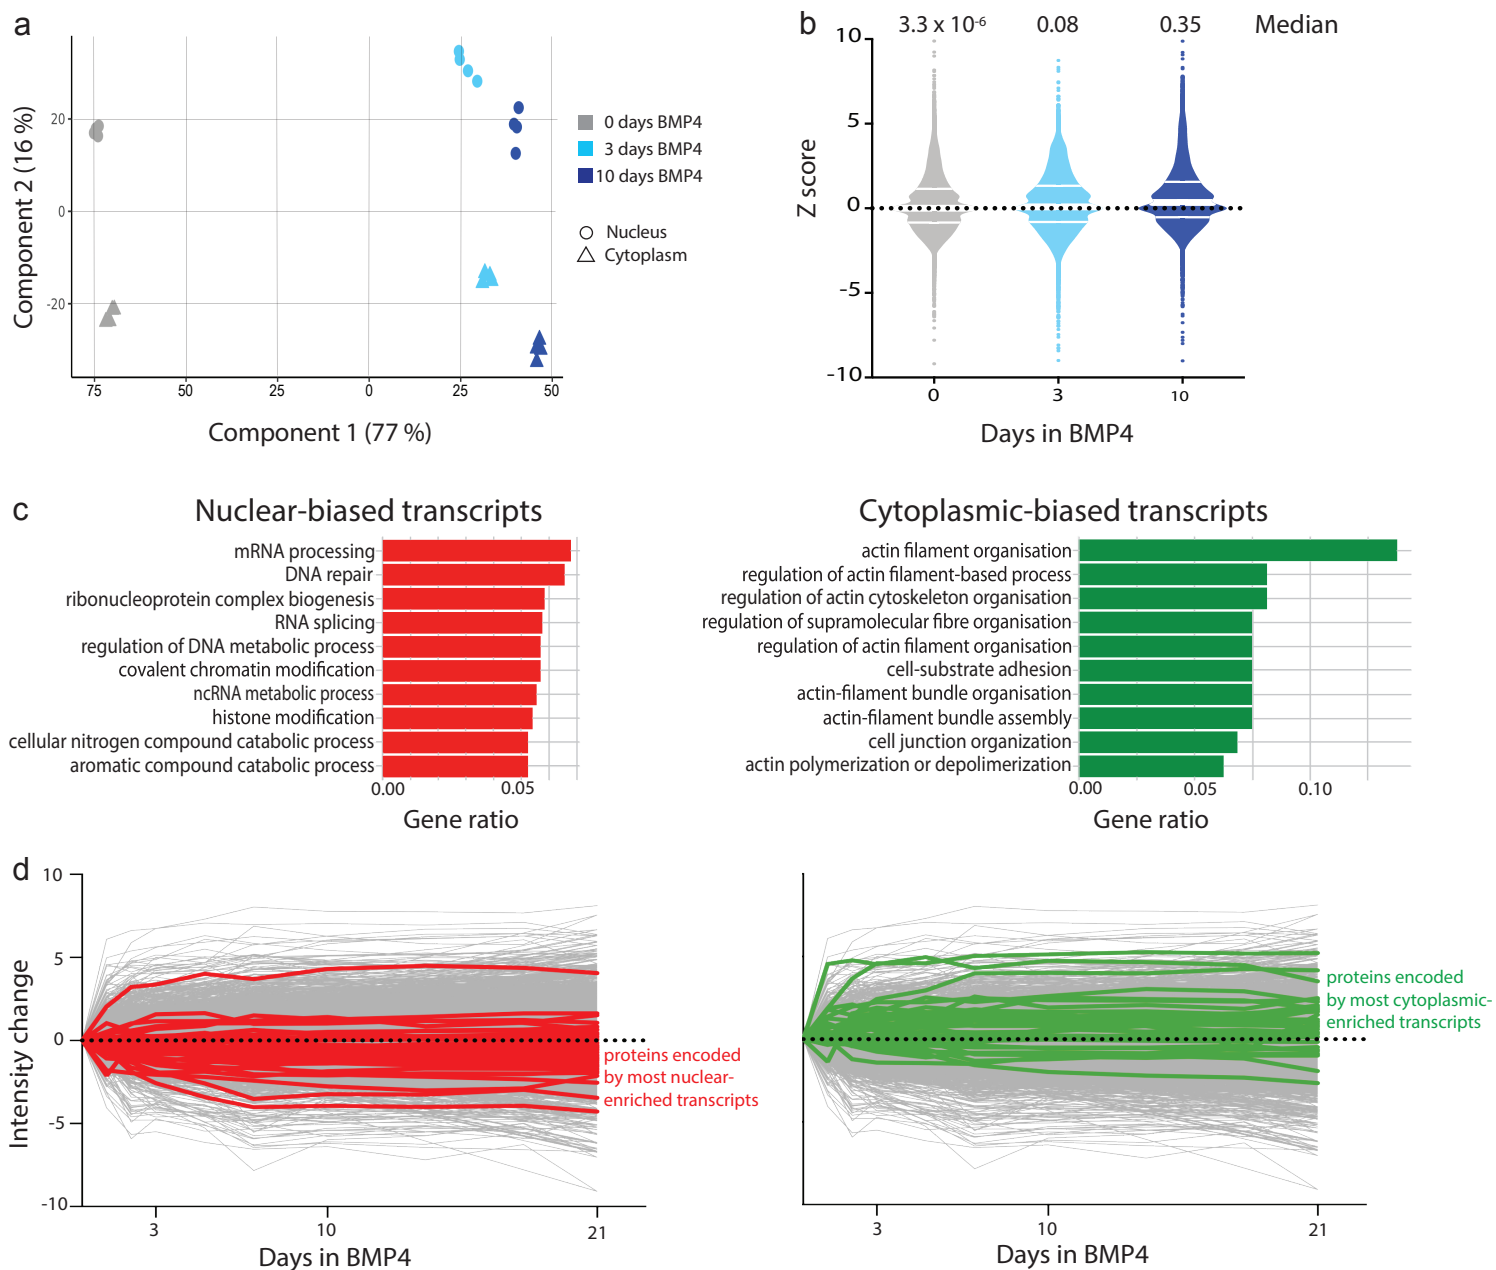

**Fig. 6 | Nuclear retention of (coding) transcripts increases as NSCs transition between active and deeper quiescence states.** **a**, PCA plot. **b**, Z scores at 0, 3 and 10 days in BMP4 for all transcripts detected across conditions (omitting eleven data points out of range); white lines: median and quartile boundaries. **c**, Most nuclear-biased (10, red) and cytoplasmic-biased (10, green) biological process GO terms in qNSCs relative to aNSCs. **d**, TMT protein intensity changes (difference, arbitrary units) from Day 0 (aNSCs) for proteins corresponding to the most nuclear (left, red) and most cytoplasmic (right, green) biased transcripts. By TMT, we detected 46 proteins corresponding to the top 100 most nuclear-biased coding transcripts in qNSCs, most of which (36) were downregulated; and 36 proteins corresponding to the top 100 most cytoplasmic-biased coding transcripts in qNSCs, most of which (25) were upregulated.

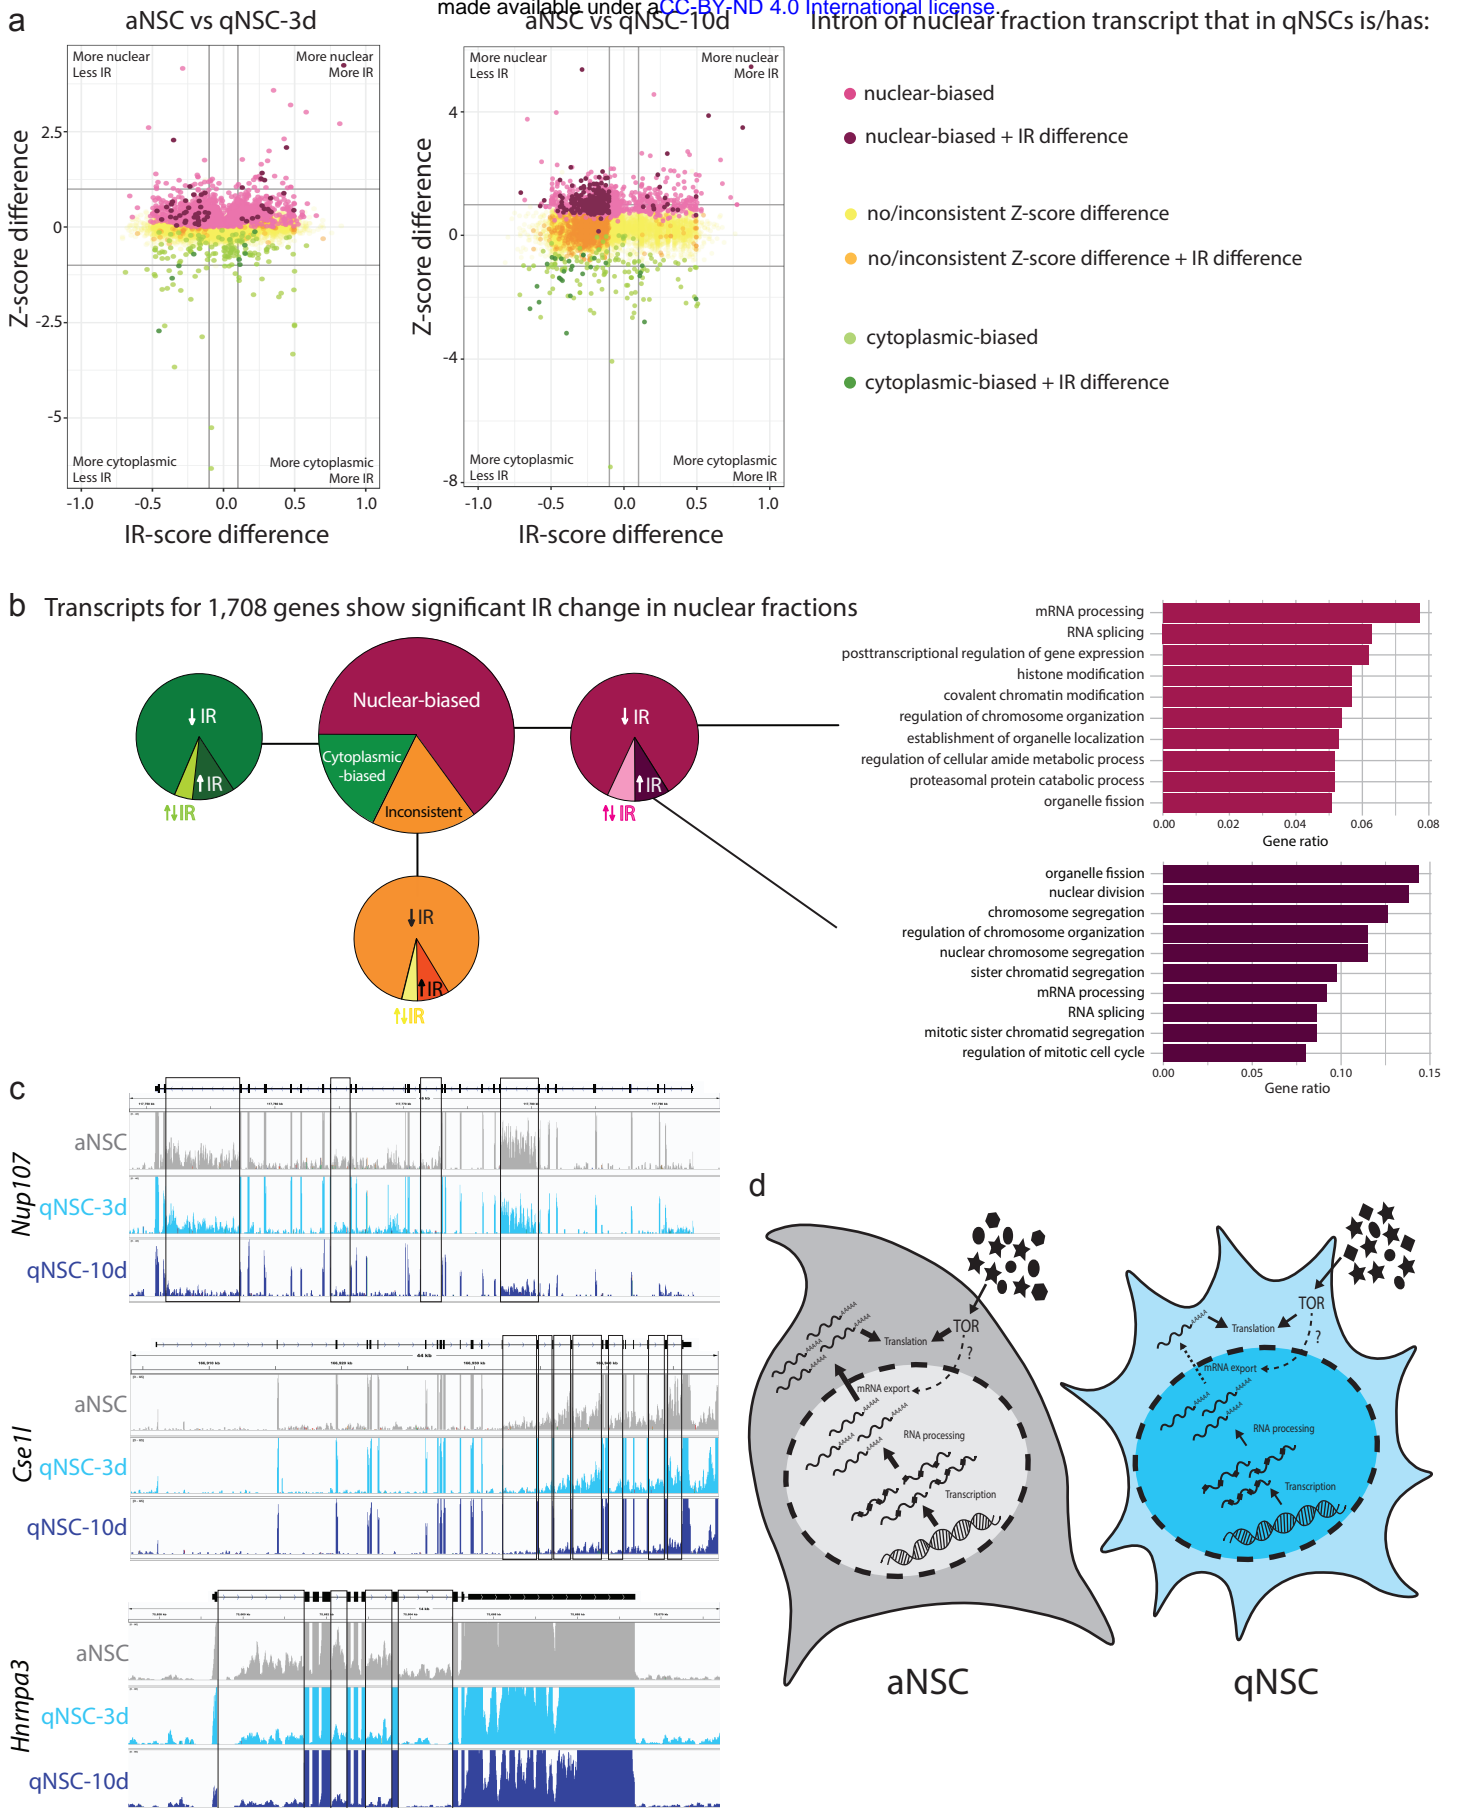

**Fig. 7 | Nuclear-biased transcripts show decreased intron retention in the nucleus of qNSCs relative to that of aNSCs. a-d** all depict data from nuclear fractions. **a.** Plot of Z-score and IR-score differences between aNSCs and qNSCs per gene (single intron with largest IR difference plotted per gene). **b.** Large pie chart: breakdown of nuclear fraction genes according to Z-score bias in qNSCs relative to aNSCs; small pie charts: breakdown of (un)biased genes according to direction of differential IR. Right: Top 10 most enriched biological process GO terms for genes in the categories indicated. **c.** Representative sequencing coverage tracks of nuclear transcripts for indicated genes and conditions. Differential IR events (decreased in qNSCs) are highlighted by black boxes. **d.** Proposed model.

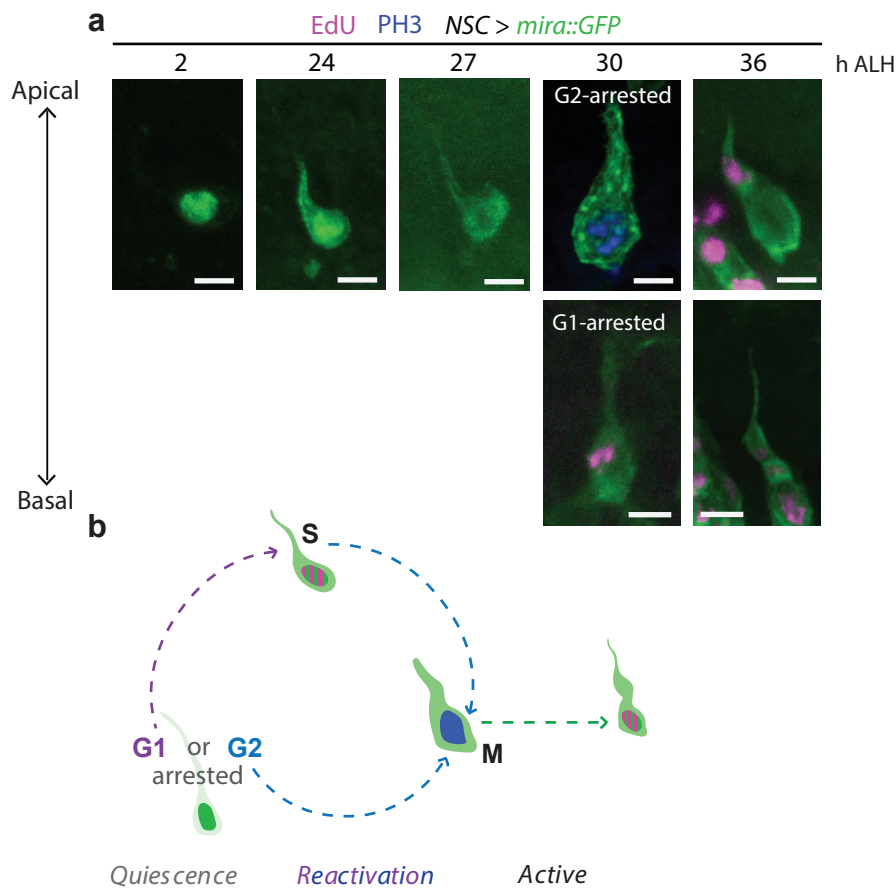

**Extended Data Fig. 1 | Sequence of events during *Drosophila* qNSC reactivation.**

**a**, Top row: timecourse of Mira::GFP localisation in a NSC reproducibly identified across specimen and used as model (ALH, after larval hatching; note that precise timings vary between NSCs). Deeply quiescent NSCs present nuclear Mira, a cell-body of  $\leq 6\mu\text{m}$  and a long thin basal fibre ( $\leq 0.2\mu\text{m}$  at the neck, i.e., junction with cell body). As NSCs emerge from deep quiescence, Mira localises not only to the nucleus but also to the cell cortex, decorating the fibre; the fibre thickens and eventually Mira is excluded from the nucleus. NSCs arrested in G2 such as this model, start expressing the mitotic marker phos-pho-histone H3 (PH3) without incorporating the S-phase marker 5-ethynyl-2'-deoxy-uridine (EdU). Bottom row (different timeline): G1-arrested NSCs incorporate EdU prior to entering mitosis and becoming PH3-positive. Cell-cycle re-engagement markers are seen and mitosis completed whilst NSCs still harbour a fibre. Fibres are lost via inheritance by the firstborn post-reactivation basal daughter, a transit-amplifying progenitor named ganglion mother cell (GMC) in *Drosophila*. Images are maximum intensity projections of a few optical sections; scale bars:  $5\mu\text{m}$ . **b**, Schematic representation of these events colour-coded as per a.

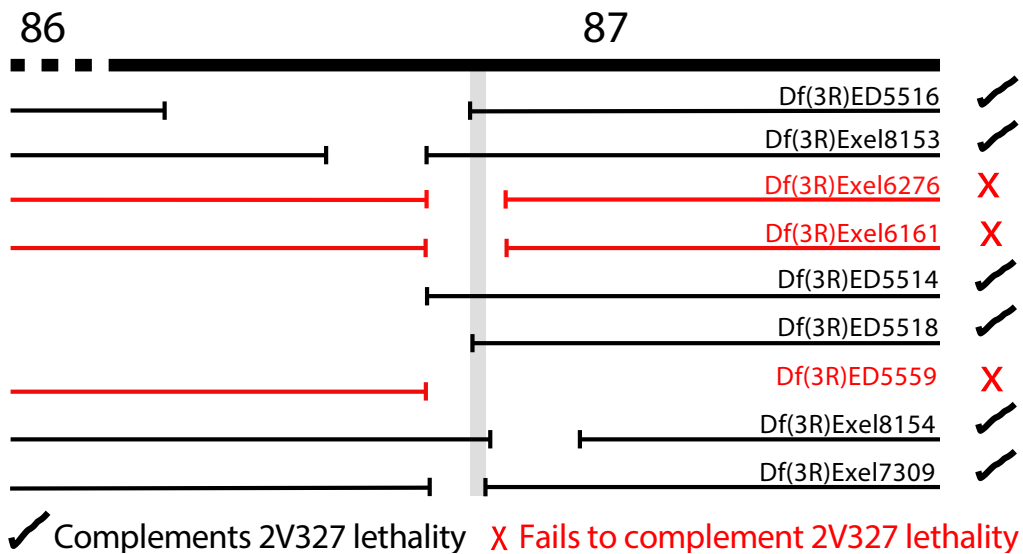

**Extended Data Fig. 2 | Deficiency mapping defined a small genomic interval responsible for the 2V327 phenotype.** Phenotype in FRT82B MARCM clones revealed the 2V327 genomic lesion to be located on chromosome arm 3R. Assuming lethality of the mutation, complementation tests with DrosDel and Exelixis deficiencies (Df) uncovering 3R exposed a small candidate region between cytological locations 86-87 (grey). Regions uncovered by each Df are indicated by the gap in the line under each Df name.

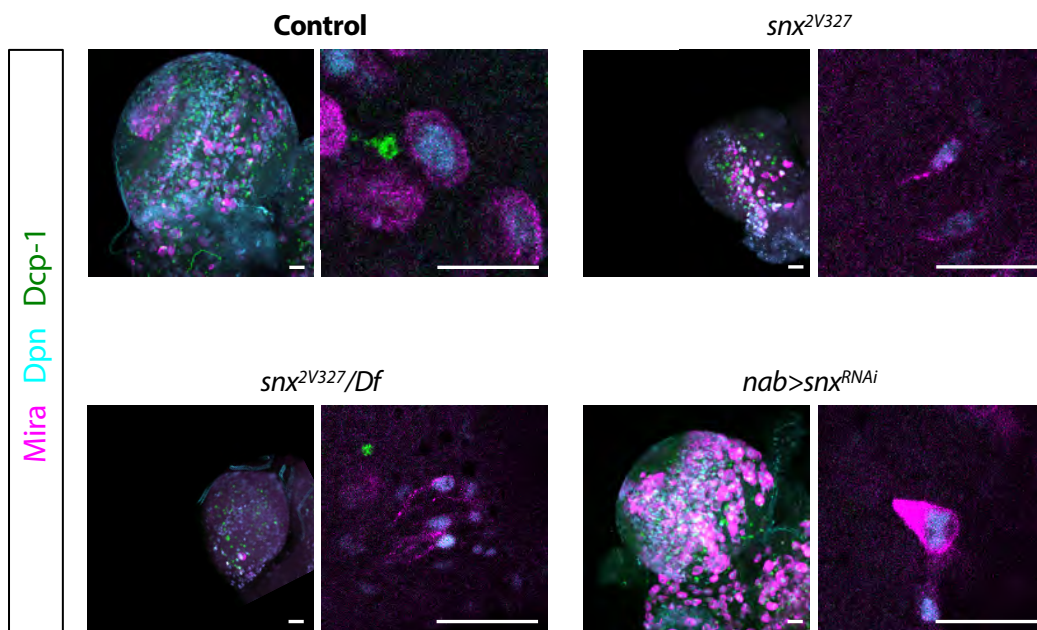

**Extended Data Fig. 3 | Mutant or RNAi *snx* NSCs do not express detectable levels of cleaved *Drosophila* Death Caspase-1.** Shown is a low magnification of a whole late larval *Drosophila* brain lobe (left) and a high magnification of one/few NSCs (right) of the genotypes indicated. Scale bars: 15  $\mu$ m.



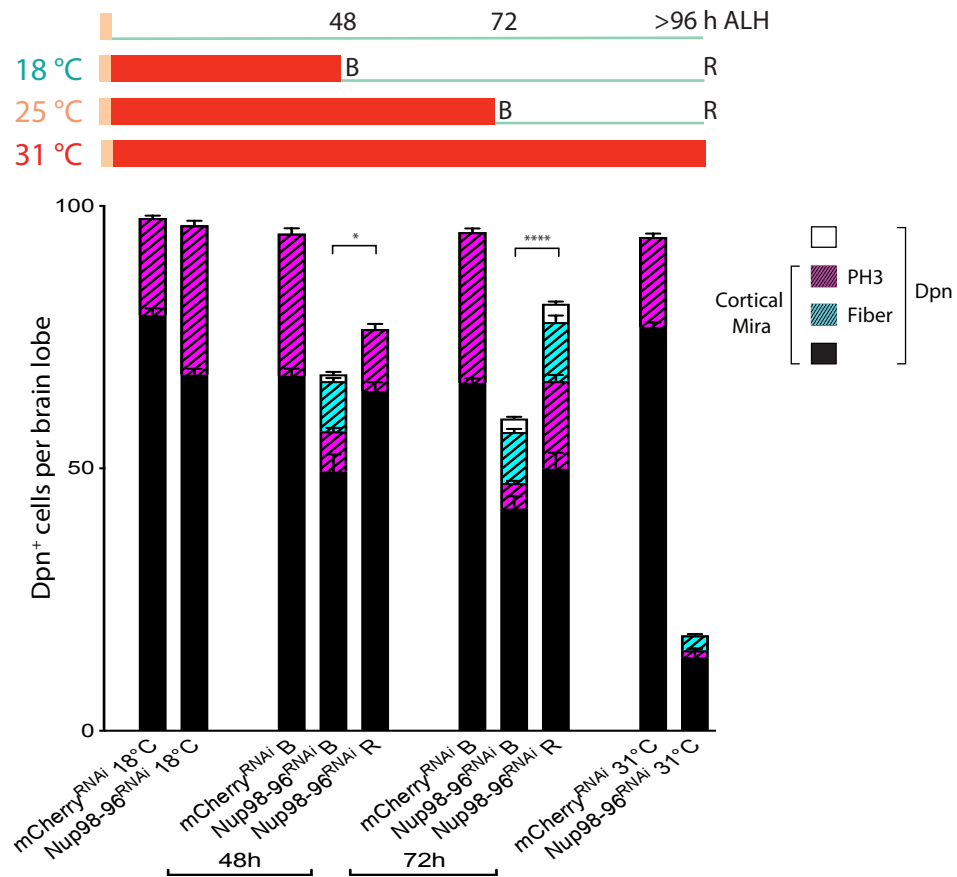

**Extended Data Fig. 4 | Downregulation of *Drosophila* Nup98-96 induces anachronical qNSCs.** Experimental design (schematised) and quantifications as per Fig. 1d,e. Histograms represent mean and error bars s.e.m. Student's t-test was performed to compare number of Dpn<sup>+</sup> cells in the conditions indicated; \*p<0.05. \*\*\*\*p<0.001.

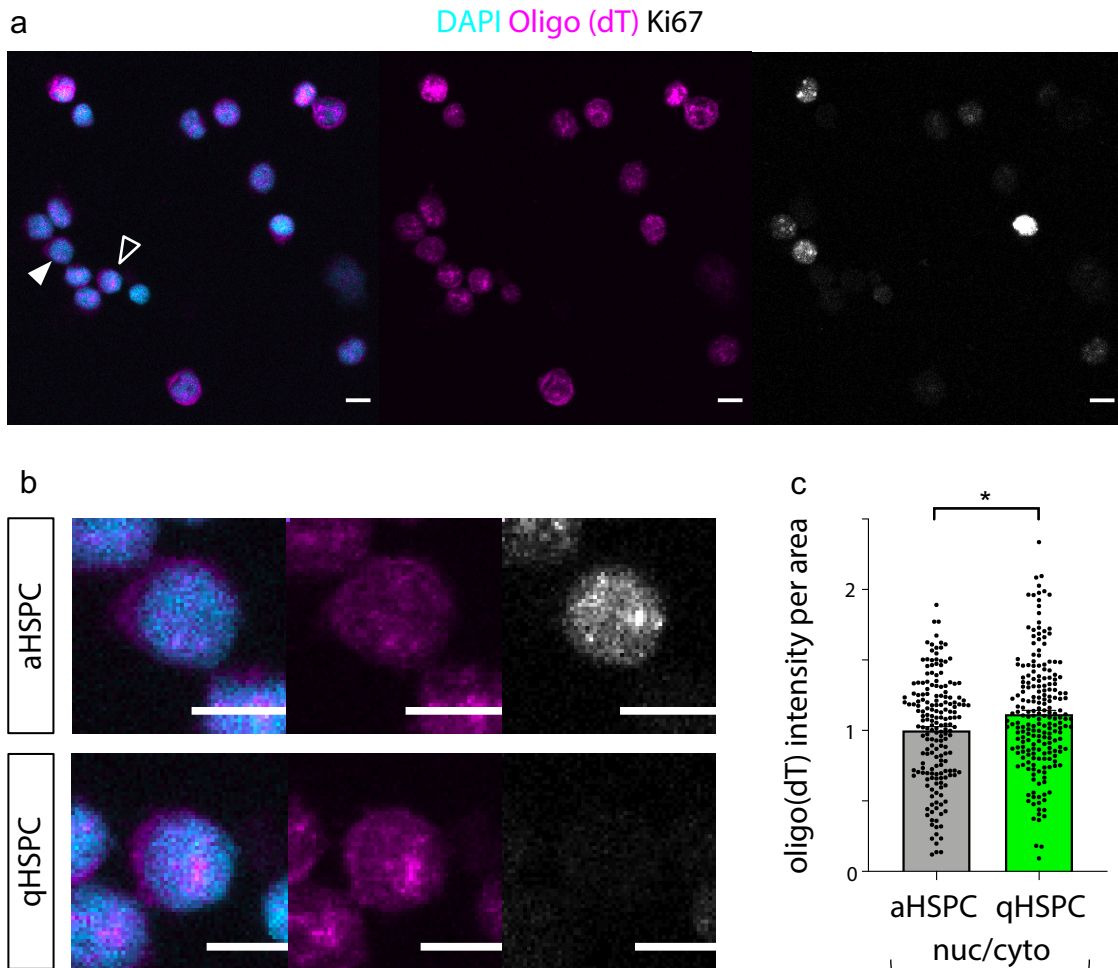

**Extended Data Fig. 5 | Quiescent haematopoietic stem cells accumulate nuclear poly(A) RNA relative to active counterparts.** **a**, Adult bone marrow derived CD34<sup>+</sup>CD38<sup>-</sup> haematopoietic stem and progenitor cells (HSPCs) sorted from a bone marrow aspirate of a healthy donor. Active HSPCs (aHSPCs) were distinguished from quiescent HSPCs (qHSPCs) by presence/absence of Ki67 (filled and open arrowheads, respectively). Significant anticorrelation was observed between Ki67 mean intensity and nucleocytoplasmic ratio of poly(A) RNA (Pearson's product moment correlation, correlation coefficient -0.19,  $p=0.0001$ ; not shown). **b**, High magnification of aHSPC and qHSPC (arrowheads in low-magnification). **c**, Quantifications from specimen such as those depicted in **a**; Mann-Whitney test,  $*p<0.05$ . Images are SUM intensity projections of Z-stack; scale bars: 10  $\mu\text{m}$ . Histograms represent mean and error bars s.e.m. of values normalised to aHSPC average.

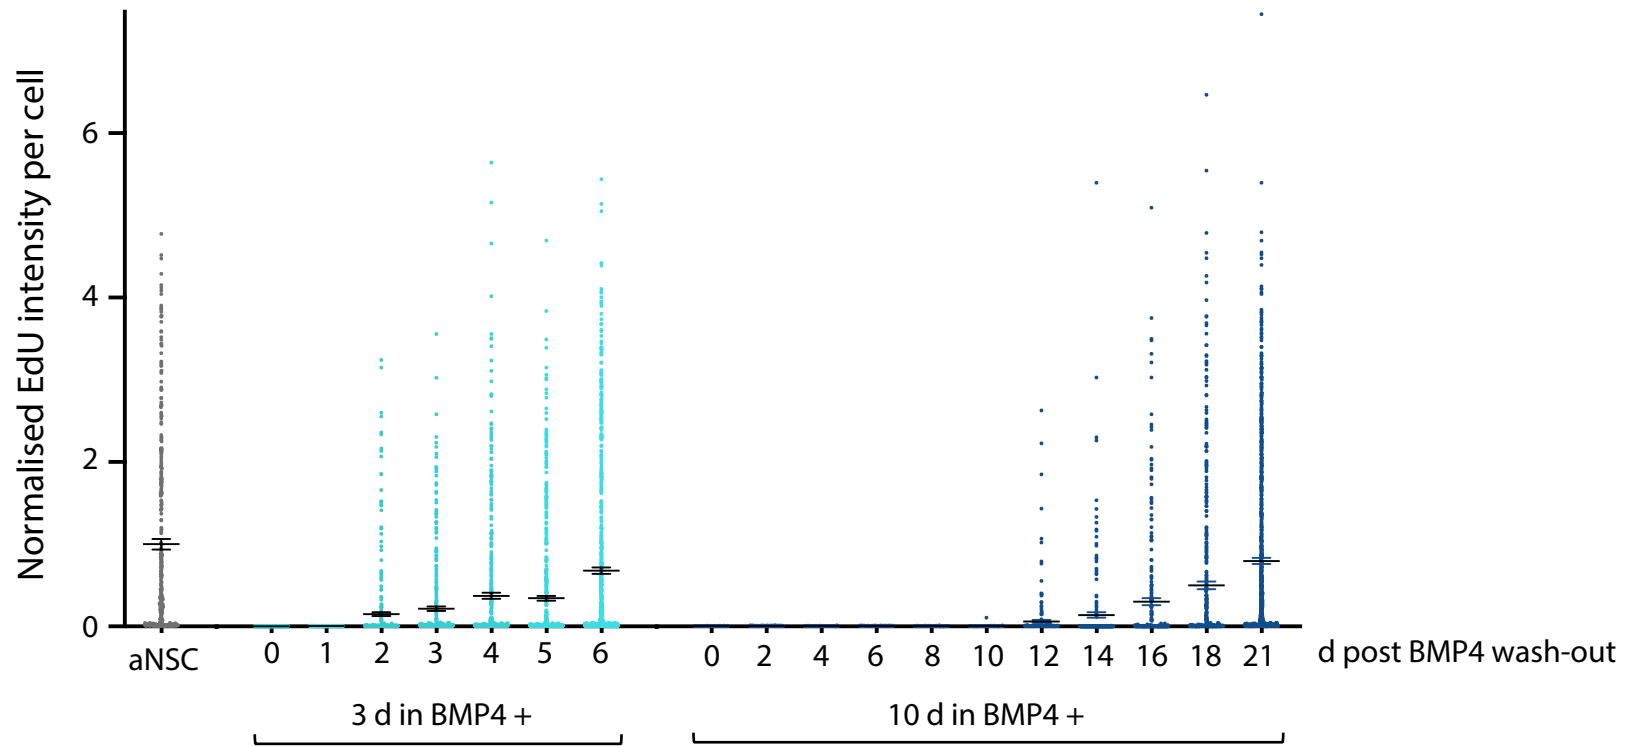

**Extended Data Fig. 6 | Longer exposure to BMP4 induces deeper quiescence in adult mouse hippocampal NSC cultures.** EdU intensity was determined for individual nuclei and normalised to average of active condition. Following BMP4 wash-out, qNSCs that had been exposed to BMP4 for 3 d reactivated faster than those exposed to BMP4 for 10 d. Histograms represent mean and error bars s.e.m..

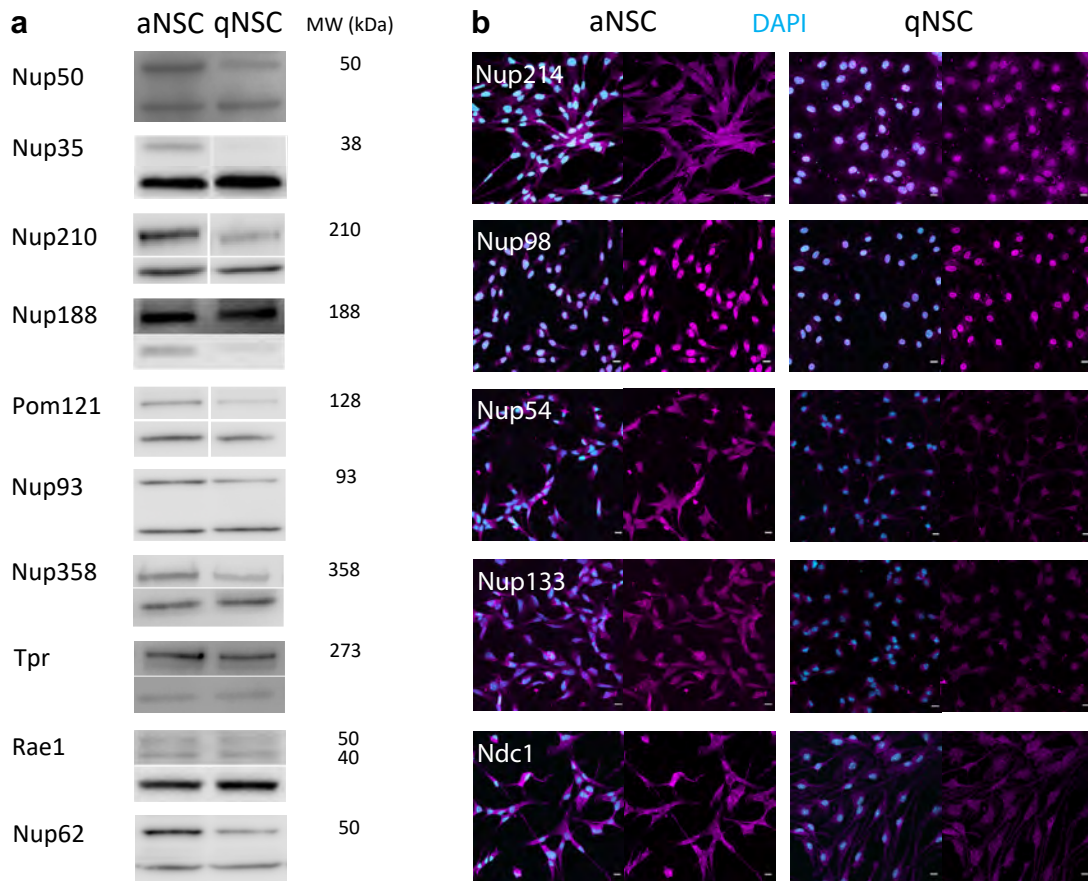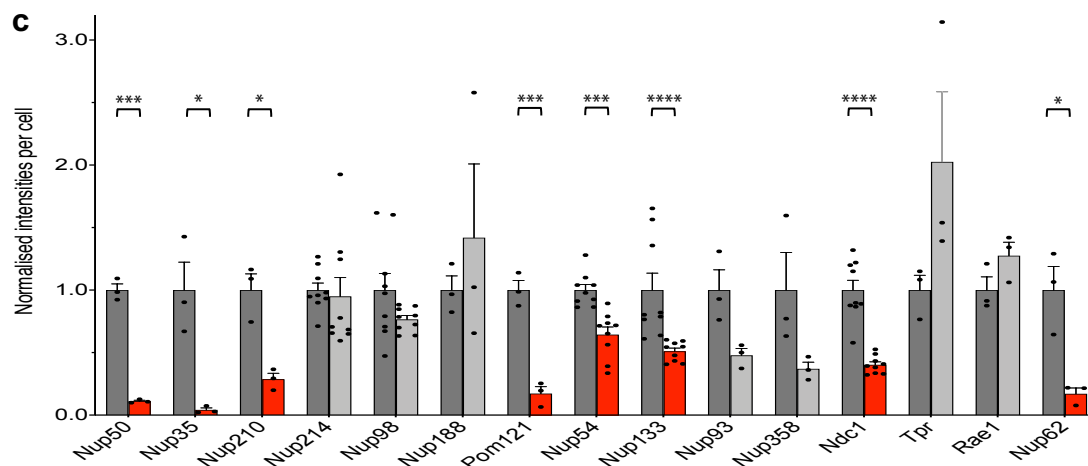

**Extended Data Fig. 7 | Assessment of nucleoporin downregulation in qNSCs relative to aNSCs.** **a.** Nucleoporins assessed by Western blot (WB); for each, lower band shows Actin loading control at 42 kDa. Note that the observed molecular weight (MW) can vary from the predicted due to post translational modifications and experimental factors. **b.** Nucleoporins assessed by fluorescent immunocytochemistry (ICC). **c.** Quantification of samples such as those depicted in a-b ordered from most to least downregulated in proteomics (3 data points for WB, 9 for ICC). Histograms represent mean and error bars s.e.m. of values normalised to respective aNSC average (dark grey). Welch's t test (WB): \* $p < 0.05$ , \*\* $p < 0.01$ , \*\*\* $p < 0.005$ ; Mann-Whitney test (ICC): \*\*\* $p < 0.0005$ , \*\*\*\* $p < 0.0001$ .

Actin DAPI

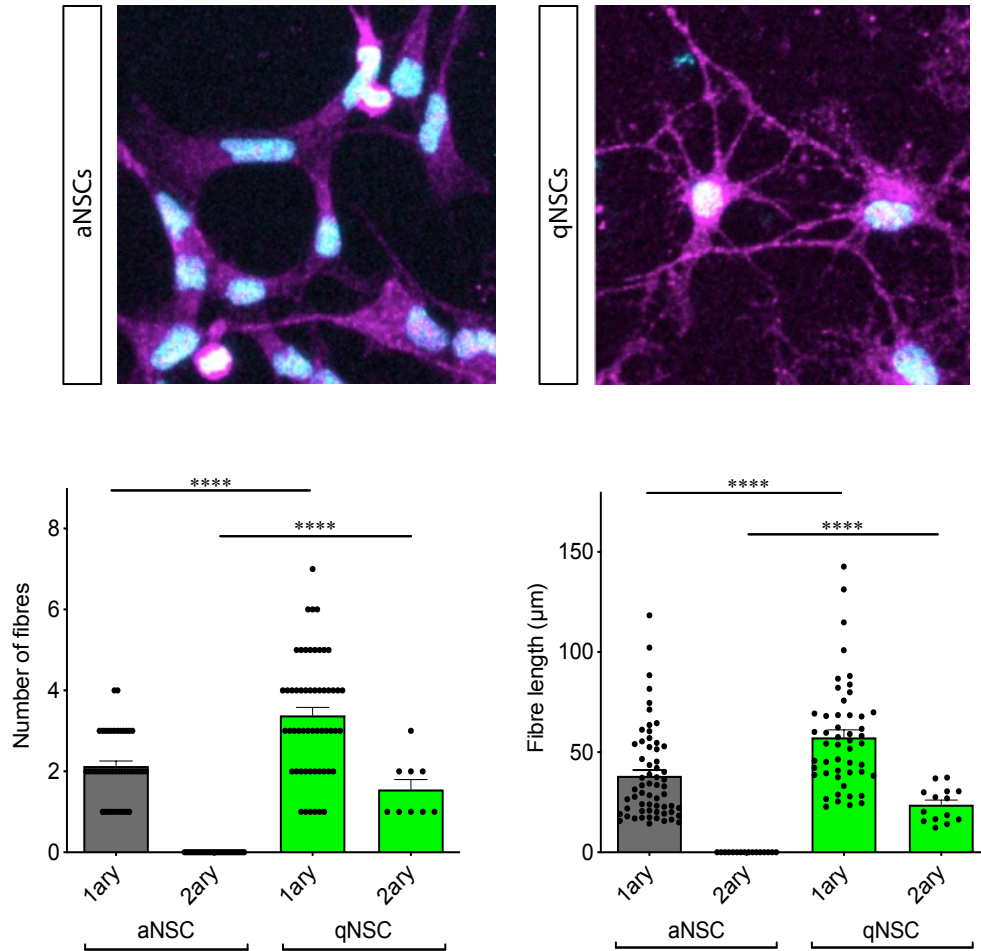

**Extended Data Fig. 8 | Mouse adult hippocampal NSCs in culture increase morphological complexity upon quiescence induction.** Images are maximum intensity projections of a few optical sections. Histograms represent mean and error bars s.e.m.. Mann-Whitney test \*\*\*\* $p < 0.0001$ .

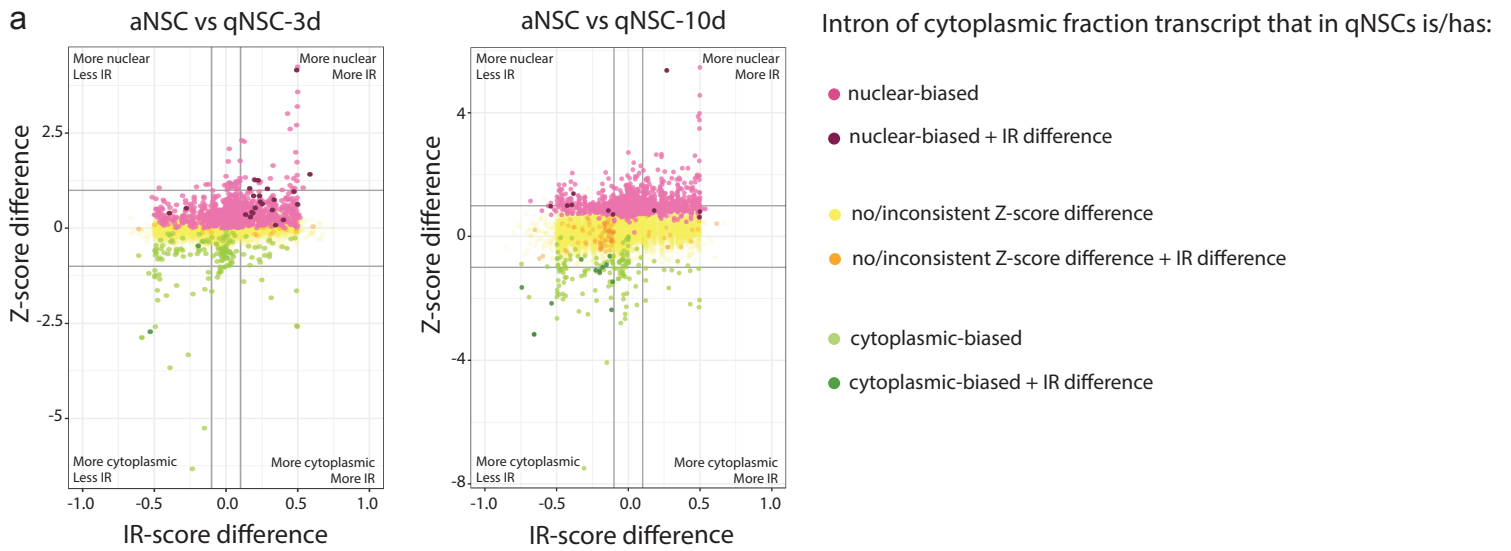

**b** Transcripts for 228 genes show significant IR change in cytoplasmic fractions

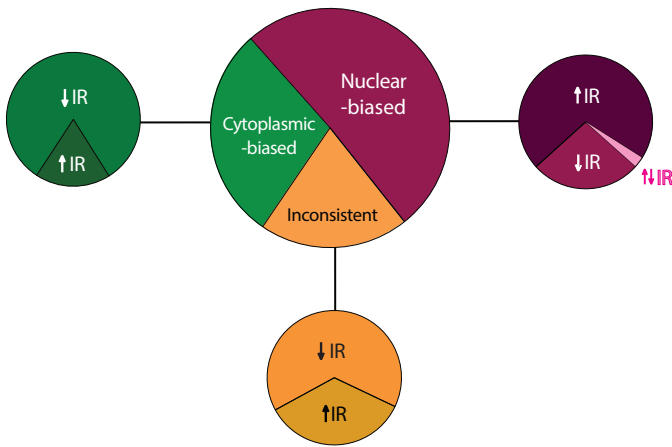

**Extended Data Fig. 9 | Nuclear-biased transcripts show increased intron retention in the cytoplasm of qNSCs relative to that of aNSCs. a-b** all depict data from cytoplasmic fractions. **a.** Plot of Z-score and IR-score differences between aNSCs and qNSCs per gene (single intron with largest IR difference plotted per gene). **b.** Large pie chart: breakdown of cytoplasmic fraction genes according to Z-score bias in qNSCs relative to aNSCs; small pie charts: breakdown of (un)biased genes according to direction of differential IR.
